# Supplementary material for: Metamaterials from the Deep: Optimized Mechano-Fluidic Materials Inspired by Deep-Sea Sponges
Source: Research Square preprint supplement (doi:10.21203/rs.3.rs-7756357/v1), 2025-10-17
Supplement: Supplementary file 1 [file README.docx]

Install required libraries, updated desired parameters in main.py and run main.py with other .py files in the same folder. A STL model will be created with the specified parameters
