# Supplementary material for: Metamaterials from the Deep: Optimized Mechano-Fluidic Materials Inspired by Deep-Sea Sponges
Source: Research Square preprint supplement (doi:10.21203/rs.3.rs-7756357/v1), 2025-10-17
Supplement: Supplementary file 4 [file 4ad6b8e0e4dc68ac5293b7b9.xlsx]

## Sheet: OptimizationResults
	Iterations			Design Parameters								Optimum	Mechanical Cost			Fluidic Cost
	Iteration #	Batch #	# in Batch	NV	NC	W	H	NL	RH	NCW	NCCW	Pareto	Buckl. Load	Volume	FEA Cost	mean_drag	mean_lift	rms_lift	Norm. Drag	Norm. Lift	Norm. RMS	CFD Cost
	1	LHS	1	23	69	0.295	0.405	4	1.09	1	2	No	-220.215	10559.6	1.07499	0.385519	0.000271563	0.000315611	0.324421	-0.897906	-0.207074	-0.238941
	2	LHS	2	30	74	0.155	0.195	2	0.67	1	3	No	-34.742	4487.9	1.56034	0.513709	0.000333736	8.2573e-08	2.46484	-0.837213	-1.19136	-0.389291
	3	LHS	3	28	47	0.445	0.155	6	1.37	1	1	No	-19.2079	2258.29	1.53205	0.380435	0.000659112	0.00053684	0.239528	-0.519583	0.48305	0.233819
	4	LHS	4	36	34	0.225	0.615	6	1.25	1	1	No	-119.921	3041.79	0.387691	0.33423	0.000506846	8.48015e-05	-0.53196	-0.668224	-0.927082	-0.796286
	5	LHS	5	38	40	0.355	0.325	4	0.83	2	2	No	-125.213	2460.74	-0.0364527	0.362549	0.000714949	0.000283179	-0.0591182	-0.465075	-0.308245	-0.289786
	6	LHS	6	31	50	0.165	0.545	3	1.07	1	0	No	-54.6757	1594.41	0.577647	0.397696	0.000680595	0.000589857	0.52775	-0.498611	0.648436	0.394889
	7	LHS	7	24	44	0.325	0.245	2	0.85	1	1	No	-60.7505	4895.88	1.38759	0.45513	0.000729926	0.000103815	1.48675	-0.450454	-0.867771	-0.313404
	8	LHS	8	39	66	0.345	0.265	5	1.35	3	3	No	-125.764	4883.77	0.893753	0.321066	0.00179135	0.000833779	-0.751771	0.585699	1.40935	0.812396
	9	LHS	9	32	36	0.235	0.555	3	0.81	2	1	No	-109.932	2143.09	-0.0517072	0.392301	0.00104756	0.00156524	0.437669	-0.140385	3.69114	2.27414
	10	LHS	10	36	68	0.485	0.165	4	1.11	1	2	No	-54.3824	2453.19	1.02637	0.426291	0.000294762	0.000700837	1.00521	-0.875259	0.99464	0.622774
	11	LHS	11	38	52	0.205	0.485	1	1.31	1	3	No	-138.702	2408.7	-0.284424	0.367089	0.000484018	0.000287592	0.0166946	-0.690509	-0.294478	-0.31145
	12	LHS	12	34	62	0.455	0.185	2	1.41	2	1	No	-132.633	17750.9	1.57031	0.411258	0.000210674	0.000386886	0.754198	-0.957346	0.0152703	-0.0314675
	13	LHS	13	22	43	0.635	0.205	2	0.99	2	2	No	-58.0767	6805.93	1.53102	0.396704	0.000248741	0.000153197	0.511187	-0.920185	-0.713724	-0.510034
	14	LHS	14	42	67	0.245	0.315	6	1.29	2	2	No	-123.785	3698.37	0.60807	0.315654	0.000477788	0.000313129	-0.842139	-0.69659	-0.214816	-0.436636
	15	LHS	15	24	53	0.385	0.275	2	1.17	0	1	No	-124.083	10117.9	1.39295	0.407658	0.00117884	0.000215603	0.694092	-0.0122243	-0.519047	-0.175055
	16	LHS	16	37	49	0.185	0.395	4	0.65	3	3	No	-81.6898	1806.57	0.173251	0.435284	0.000947829	0.000120352	1.15537	-0.237739	-0.816181	-0.306183
	17	LHS	17	48	57	0.435	0.375	3	0.73	2	3	No	-283.337	3900.58	-0.841664	0.367076	0.00146426	0.000532844	0.0164731	0.266403	0.470586	0.338927
	18	LHS	18	20	32	0.415	0.535	5	1.23	0	2	No	-183.281	3090.92	-0.347812	0.312217	0.00179811	0.000157623	-0.899521	0.592299	-0.699915	-0.481393
	19	LHS	19	48	39	0.305	0.415	5	1.51	0	2	No	-185.964	3541.62	-0.0965604	0.281862	0.00148421	0.000556029	-1.40636	0.28587	0.542912	0.101649
	20	LHS	20	29	51	0.505	0.505	4	1.19	2	1	No	-379.985	4840.46	-1.05863	0.361606	0.00464706	0.000477516	-0.074851	3.37343	0.297989	0.838509
	21	LHS	21	44	55	0.565	0.345	5	1.47	2	0	No	-315.033	5034.73	-0.469044	0.320933	0.0010505	0.000663242	-0.753992	-0.137514	0.877362	0.348116
	22	LHS	22	35	59	0.375	0.435	6	0.87	2	2	No	-269.174	3924.8	-0.691518	0.385807	0.00274387	0.000483858	0.329239	1.51554	0.317773	0.55962
	23	LHS	23	49	42	0.535	0.575	4	1.53	3	1	No	-731.098	7888.46	-1.58337	0.281664	0.00223489	5.43297e-05	-1.40967	1.01868	-1.02214	-0.691481
	24	LHS	24	44	46	0.315	0.175	5	1.13	2	1	No	-33.7921	2058.72	1.23934	0.40968	0.000870902	0.000429687	0.727851	-0.312834	0.148787	0.172275
	25	LHS	25	26	60	0.365	0.525	6	1.57	3	1	No	-344.873	6442.88	-0.134299	0.277306	0.00072939	0.000177587	-1.48244	-0.450978	-0.637638	-0.769266
	26	LHS	26	22	54	0.285	0.225	2	1.05	2	2	No	-45.3661	8250.28	1.64334	0.454185	0.000506309	0.000164775	1.47096	-0.668749	-0.677604	-0.24612
	27	LHS	27	26	65	0.215	0.475	5	0.69	2	3	No	-141.031	2446.46	-0.286762	0.396409	0.000314515	0.00020981	0.506253	-0.855977	-0.537119	-0.392216
	28	LHS	28	50	48	0.625	0.295	2	0.77	1	1	No	-241.264	3882.79	-0.452928	0.396027	0.00027477	0.000449596	0.499881	-0.894775	0.210893	0.0475566
	29	LHS	29	34	63	0.495	0.385	3	0.79	1	1	No	-248.916	3789.51	-0.584281	0.338354	0.00146693	0.000139696	-0.463111	0.269001	-0.755839	-0.492326
	30	LHS	30	41	41	0.515	0.365	2	1.15	0	0	No	-214.275	3117.08	-0.697412	0.436765	0.0020996	0.000221176	1.18009	0.88661	-0.501662	0.112343
	31	LHS	31	47	33	0.395	0.585	1	1.49	3	1	No	-389.027	4871.62	-1.10874	0.267923	0.00135125	5.1779e-05	-1.63912	0.156077	-1.0301	-0.914665
	32	LHS	32	21	52	0.615	0.255	3	0.97	0	2	No	-91.52	7007.74	1.36349	0.367552	0.00164762	0.000299571	0.0244201	0.445389	-0.25711	-0.060304
	33	LHS	33	46	56	0.405	0.335	1	0.71	2	0	No	-203.387	3446.17	-0.337515	0.383251	0.00160385	0.000383935	0.286555	0.402662	0.00606524	0.141483
	34	LHS	34	23	37	0.195	0.635	3	1.43	0	1	No	-41.2721	1773.77	0.985665	0.383871	0.000473137	0.000612214	0.296901	-0.70113	0.718178	0.350061
	35	LHS	35	28	70	0.545	0.455	2	0.95	1	2	No	-856.821	9873.62	-1.36498	0.280932	0.000401269	0.000133754	-1.42189	-0.771287	-0.774376	-0.903262
	36	LHS	36	35	38	0.595	0.285	4	1.27	1	0	No	-126.903	2837.73	0.191699	0.386285	0.00359388	0.0002796	0.337216	2.34533	-0.31941	0.344862
	37	LHS	37	27	30	0.475	0.515	4	0.63	1	2	No	-230.067	3026.69	-0.966508	0.379488	0.00175227	0.00114308	0.22372	0.547556	2.37423	1.57879
	38	LHS	38	43	35	0.255	0.645	4	1.21	3	0	No	-249.324	3677.83	-0.662207	0.3052	0.00241221	0.000496524	-1.01668	1.19178	0.357285	0.249392
	39	LHS	39	30	72	0.605	0.565	5	1.33	3	1	No	-757.669	8729.96	-1.36537	0.242552	9.64079e-05	0.000528663	-2.06273	-1.06889	0.457542	-0.3518
	40	LHS	40	40	45	0.645	0.425	3	0.61	2	1	No	-387.873	4905.57	-1.07958	0.347272	0.00107328	0.000255677	-0.31419	-0.115275	-0.394035	-0.322314
	41	LHS	41	32	31	0.275	0.595	3	1.59	2	2	No	-144.911	3950.24	0.489113	0.299236	0.00210401	0.00105974	-1.11627	0.890915	2.11422	1.22346
	42	LHS	42	47	61	0.525	0.355	5	1.01	2	0	No	-324.063	4512.49	-0.811129	0.358825	0.000601622	0.000582913	-0.121288	-0.575704	0.626777	0.236668
	43	LHS	43	41	64	0.335	0.625	5	1.39	3	2	No	-598.721	6949.88	-1.34164	0.29489	0.00185398	0.000223624	-1.18884	0.646837	-0.494025	-0.404815
	44	LHS	44	45	58	0.585	0.445	1	1.55	1	3	No	-466.594	6594.05	-0.772087	0.321182	0.000256181	0.000102073	-0.749832	-0.912922	-0.873202	-0.856472
	45	LHS	45	25	59	0.175	0.215	3	0.89	1	0	No	-29.5216	5771.62	1.65754	0.500392	9.16237e-05	1.17802e-05	2.24249	-1.07356	-1.15487	-0.459137
	46	LHS	46	33	37	0.425	0.465	2	0.91	0	2	No	-229.197	2963.39	-1.01574	0.384182	0.00234484	0.000229803	0.302099	1.12602	-0.47475	0.000773315
	47	LHS	47	42	67	0.555	0.235	5	0.75	0	1	No	-144.165	2917.77	0.0181334	0.460454	0.000772068	0.000268326	1.57564	-0.409316	-0.354579	0.0205175
	48	LHS	48	40	73	0.265	0.495	3	1.45	1	2	No	-272.643	4037.29	-0.652592	0.30373	0.00046475	7.19298e-05	-1.04123	-0.709318	-0.967235	-0.930451
	49	LHS	49	46	71	0.575	0.305	4	0.93	1	2	No	-297.413	4593.32	-0.549615	0.360684	0.00035204	0.000111652	-0.0902454	-0.819345	-0.843323	-0.687912
	50	LHS	50	29	45	0.465	0.605	1	1.03	2	3	No	-424.2	4477.34	-1.65977	0.354097	0.0040584	0.00104435	-0.200237	2.79878	2.06622	1.75944
	51	1	1	47	34	0.57643	0.645007	2	0.839568	0	0	No	-616.94	6425.91	-1.707	0.333004	0.00116359	0.000532077	-0.552438	-0.0271186	0.468192	0.165
	52	1	2	22	31	0.65	0.50976	1	0.601146	0	0	No	-273.281	3442.17	-1.092	0.314769	0.0021807	0.000531354	-0.856915	0.965784	0.465938	0.301
	53	1	3	47	35	0.533116	0.643749	2	0.820613	0	0	No	-571.591	5976.47	-1.693	0.3407	0.00163827	5.3622e-05	-0.423931	0.436269	-1.02435	-0.612
	54	1	4	23	31	0.649996	0.509755	1	0.60113	0	3	No	-269.653	3536.34	-0.975	0.321726	0.0049288	0.000210812	-0.740739	3.64846	-0.533993	0.261
	55	1	5	47	34	0.575839	0.645146	4	0.847546	0	0	No	-616.392	6418.01	-1.708	0.344118	0.000875985	0.000123475	-0.366858	-0.307872	-0.806439	-0.619
	56	1	6	47	34	0.535687	0.645095	2	0.836593	0	0	No	-567.662	5973.05	-1.671	0.335839	0.00137741	0.000159909	-0.505097	0.181616	-0.692784	-0.48
	57	1	7	22	31	0.65	0.509769	1	0.60111	0	0	No	-273.29	3442.23	-1.092	0.319112	0.0020245	0.000344722	-0.784388	0.813301	-0.116259	-0.064
	58	1	8	47	35	0.533118	0.63737	2	0.814378	0	0	No	-562.584	5917.22	-1.672	0.342848	0.00177665	0.000121156	-0.38806	0.571351	-0.813674	-0.452
	59	1	9	23	31	0.649997	0.50977	1	0.601109	0	1	No	-267.161	3467.41	-1.005	0.319357	0.00518212	0.000273723	-0.780295	3.89575	-0.337743	0.42
	60	1	10	47	35	0.551279	0.638052	2	0.836547	0	0	No	-585.456	6125.52	-1.691	0.342132	0.00178143	3.93192e-05	-0.400028	0.576017	-1.06896	-0.606
	61	1	11	47	34	0.576167	0.645198	2	0.839604	0	0	No	-616.91	6424.88	-1.707	0.343227	0.000902922	0.00012965	-0.381741	-0.281577	-0.787176	-0.605
	62	1	12	23	30	0.649996	0.509755	1	0.601001	0	2	No	-262.296	3449.19	-0.968	0.349512	0.000931422	0.000631518	-0.276794	-0.253755	0.778397	0.361
	63	1	13	47	35	0.577759	0.645806	2	0.837931	0	0	No	-629.626	6497.22	-1.74	0.344212	0.000857478	0.000245484	-0.365297	-0.325939	-0.425835	-0.394
	64	1	14	22	32	0.65	0.509747	1	0.600985	0	0	No	-276.583	3496.66	-1.081	0.310657	0.00194561	0.000181997	-0.925567	0.73629	-0.623881	-0.412
	65	1	15	47	34	0.576485	0.645196	2	0.837935	0	0	No	-617.293	6428.37	-1.707	0.342347	0.000957828	7.05843e-05	-0.396434	-0.227978	-0.971432	-0.708
	66	1	16	22	30	0.649996	0.509759	1	0.601083	0	1	No	-272.763	3421.32	-1.104	0.304544	0.00271927	0.000720971	-1.02764	1.49154	1.05745	0.727
	67	1	17	22	31	0.649997	0.509747	1	0.601109	0	0	No	-273.267	3442.06	-1.092	0.318485	0.00188003	0.000448823	-0.794854	0.672271	0.208482	0.101
	68	1	18	47	35	0.534469	0.645067	2	0.836593	0	0	No	-575.136	6004.22	-1.698	0.340282	0.00165005	0.00012382	-0.430914	0.447765	-0.805363	-0.48
	69	1	19	47	34	0.576099	0.645222	4	0.847486	0	0	No	-616.824	6421.66	-1.708	0.343176	0.00103775	0.000221548	-0.382597	-0.149954	-0.5005	-0.407
	70	1	20	23	31	0.649996	0.509747	1	0.601129	0	2	No	-267.69	3501.79	-0.982	0.349927	0.00130131	0.000391648	-0.269858	0.10733	0.0301257	-0.014
	71	2	1	40	49	0.65	0.645026	1	1.53277	0	3	No	-889.765	9052.66	-1.791	0.270848	4.67931e-05	0.000378993	-1.59027	-1.11733	-0.00935332	-0.547
	72	2	2	42	34	0.5837	0.58275	6	1.39567	1	0	Yes, Design I	-606.391	6118.81	-1.821	0.277312	0.000198498	4.38094e-05	-1.48233	-0.969232	-1.05496	-1.123
	73	2	3	29	30	0.528201	0.647934	3	1.11802	3	0	No	-441.08	4709.64	-1.619	0.30356	0.00335911	0.000262307	-1.04406	2.11614	-0.373353	-0.01
	74	2	4	42	30	0.530821	0.438403	1	1.59922	2	0	No	-274.51	4101.96	-0.63	0.286032	0.00104842	0.00017139	-1.33674	-0.139539	-0.656969	-0.689
	75	2	5	42	64	0.646608	0.627258	1	0.747441	3	0	No	-865.727	8564.67	-1.894	0.318962	0.000760258	0.000251329	-0.786901	-0.420844	-0.407599	-0.486
	76	2	6	47	74	0.172491	0.572895	1	0.61512	0	0	No	-185.701	2322.83	-1.112	0.421283	0.000238577	0.000718338	0.92159	-0.930107	1.04923	0.628
	77	2	7	50	63	0.456012	0.645675	1	0.65455	2	1	No	-682.867	6782.32	-1.88	0.365136	0.000673075	9.69924e-05	-0.0159232	-0.505952	-0.889053	-0.638
	78	2	8	21	74	0.649982	0.339135	6	1.55388	0	3	No	-322.743	21396.8	1.289	0.29714	0.00089478	0.00035772	-1.15127	-0.289525	-0.0757143	-0.334
	79	2	9	33	70	0.645629	0.301387	4	0.987784	3	1	No	-242.793	4812.35	-0.02	0.366058	0.00276557	0.000970389	-0.00052167	1.53673	1.83551	1.409
	80	2	10	29	70	0.646474	0.351006	4	1.19785	3	3	No	-324.758	6993.63	0.128	0.32435	0.0018674	0.000301133	-0.69693	0.659937	-0.252237	-0.159
	81	2	11	43	69	0.64723	0.564306	2	0.666805	0	3	No	-753.991	7928.18	-1.673	0.322856	0.000246888	0.000314127	-0.72187	-0.921994	-0.211701	-0.456
	82	2	12	44	70	0.646809	0.574826	6	0.799819	3	3	No	-972.046	9531.54	-1.928	0.296779	0.000153605	0.000252778	-1.1573	-1.01306	-0.403081	-0.676
	83	2	13	38	30	0.636944	0.640627	1	1.48102	2	2	No	-714.803	6733.04	-2.082	0.264154	0.00127786	0.000237761	-1.70205	0.0844369	-0.449925	-0.593
	84	2	14	38	30	0.636795	0.65	1	1.50561	0	1	No	-623.256	6202.32	-1.872	0.263222	0.000747263	0.000156697	-1.7176	-0.43353	-0.702803	-0.852
	85	2	15	42	74	0.331802	0.488519	1	0.608707	1	0	No	-266.715	3672.14	-0.841	0.344965	0.00329647	0.000823504	-0.352717	2.05499	1.3773	1.167
	86	2	16	49	74	0.324194	0.541741	1	0.625678	3	2	No	-362.348	4364.38	-1.226	0.328737	0.00194475	0.000152432	-0.623689	0.735448	-0.716108	-0.407
	87	2	17	50	68	0.289299	0.596725	1	0.880615	0	0	No	-354.954	4032.44	-1.411	0.325233	0.0060273	0.00114151	-0.682195	4.72082	2.36931	2.229
	88	2	18	31	67	0.294411	0.617409	1	0.617194	2	0	No	-272.101	3417.68	-1.1	0.408455	0.00197624	0.000574962	0.707385	0.766193	0.601973	0.656
	89	2	19	31	74	0.596771	0.373331	6	0.843105	0	0	No	-246.961	4434.63	-0.214	0.364194	0.00385842	0.000732819	-0.0316392	2.60357	1.09441	1.171
	90	2	20	50	68	0.392686	0.535978	4	0.616195	0	0	No	-411.509	4910.2	-1.255	0.373872	0.00275756	0.000541815	0.129945	1.52891	0.498569	0.631
	91	3	1	36	50	0.477141	0.643282	1	1.53271	3	3	No	-704.352	6529.11	-2.146	0.266913	0.00125089	7.29622e-05	-1.65597	0.0581053	-0.964015	-0.898
	92	3	2	38	52	0.481091	0.649999	1	1.57571	3	0	No	-652.816	6255.89	-2.015	0.272154	0.00123509	7.3501e-05	-1.56847	0.0426873	-0.962334	-0.883
	93	3	3	44	74	0.430504	0.638701	1	0.667844	1	2	No	-613.311	6423.27	-1.687	0.32737	0.00157385	0.000100973	-0.646504	0.37338	-0.876636	-0.581
	94	3	4	42	74	0.357329	0.638228	1	0.653166	0	3	No	-478.981	5237.62	-1.538	0.324536	0.00226229	0.000134939	-0.693818	1.04543	-0.770677	-0.392
	95	3	5	49	74	0.584428	0.6044	5	1.37152	0	0	No	-813.254	8405.24	-1.734	0.301311	0.000798127	0.000545075	-1.08162	-0.383877	0.508739	0.012
	96	3	6	49	72	0.5844	0.599043	3	1.3705	1	3	No	-1091.6	9566.2	-2.377	0.254938	0.00100065	0.000139796	-1.85592	-0.186178	-0.755526	-0.862
	97	3	7	50	45	0.604454	0.646079	2	1.53564	1	3	No	-1030.98	8966.11	-2.409	0.281301	0.000720579	8.11002e-05	-1.41573	-0.459579	-0.938628	-0.938
	98	3	8	50	43	0.604462	0.645705	2	1.53574	0	3	No	-974.798	8545.09	-2.375	0.282557	0.000127537	0.000195934	-1.39476	-1.0385	-0.580405	-0.835
	99	3	9	42	41	0.572612	0.551945	6	0.600831	2	2	No	-550.398	5887.05	-1.613	0.315166	0.000701742	0.000100097	-0.850278	-0.477968	-0.879367	-0.793
	100	3	10	48	45	0.566555	0.547372	5	0.811679	1	2	No	-627.843	6519.93	-1.717	0.327237	0.00010141	0.000574403	-0.64873	-1.06401	0.600227	0.018
	101	3	11	39	57	0.54396	0.646533	6	0.600079	1	0	No	-665.724	6643.83	-1.862	0.316294	0.00266407	7.91605e-05	-0.831438	1.43765	-0.944679	-0.446
	102	3	12	38	48	0.521151	0.615496	4	1.59776	0	3	No	-777.145	7242.17	-2.125	0.256789	0.00147299	0.00016659	-1.82503	0.274923	-0.671942	-0.713
	103	3	13	40	74	0.484793	0.646964	3	0.649006	0	3	No	-673.569	7126.37	-1.651	0.299579	0.00146567	0.000202153	-1.11054	0.267778	-0.561003	-0.505
	104	3	14	50	68	0.474577	0.646998	1	1.58521	0	3	No	-798.498	7876.31	-1.905	0.311676	0.000160423	7.19831e-05	-0.908557	-1.0064	-0.967069	-0.963
	105	3	15	45	71	0.447974	0.641228	6	0.686727	1	2	No	-674.76	6885.39	-1.78	0.348163	0.00128607	0.000165274	-0.299326	0.0924469	-0.676049	-0.447
	106	3	16	48	68	0.410323	0.64185	2	0.600442	2	2	No	-609.881	6224.62	-1.78	0.348714	0.00221998	0.000227704	-0.290118	1.00413	-0.481298	-0.146
	107	3	17	45	73	0.455263	0.642826	6	0.606521	2	0	No	-668.569	6879.79	-1.75	0.353247	0.00146655	0.000215744	-0.214428	0.268637	-0.518608	-0.3
	108	3	18	45	74	0.460919	0.649633	6	1.18991	3	3	No	-300.642	9632.99	0.692	0.276247	0.00162951	0.00042051	-1.50012	0.427718	0.12016	-0.142
	109	3	19	42	74	0.469227	0.620356	2	1.28051	2	2	No	-776.323	9456.12	-1.192	0.279766	0.00165378	0.000328919	-1.44136	0.45141	-0.165557	-0.297
	110	3	20	42	74	0.627524	0.624934	1	0.982137	3	2	No	-924.868	9244.99	-1.856	0.298539	0.000291491	0.000140713	-1.1279	-0.878452	-0.752667	-0.853
	111	4	1	50	73	0.556944	0.590279	2	0.737753	3	3	No	-831.369	8378.22	-1.826	0.299327	4.23291e-06	0.000496949	-1.11476	-1.15887	0.358612	-0.24
	112	4	2	50	74	0.376156	0.647398	2	1.58653	2	0	No	-643.779	6619.69	-1.753	0.301788	0.000524232	0.000147833	-1.07366	-0.651252	-0.730456	-0.783
	113	4	3	26	49	0.562287	0.623505	6	1.39295	0	3	No	-675.212	7011.23	-1.718	0.249687	0.000125122	0.00021692	-1.9436	-1.04086	-0.514938	-0.906
	114	4	4	44	31	0.550859	0.649363	6	0.625792	0	1	No	-571.521	5952.38	-1.707	0.308987	0.00119978	0.000134206	-0.953448	0.00821411	-0.772964	-0.653
	115	4	5	42	49	0.647361	0.644323	1	0.84396	0	1	No	-866.167	8271.93	-2.029	0.310654	0.000371143	0.000191914	-0.925615	-0.800696	-0.592946	-0.701
	116	4	6	42	50	0.649826	0.641476	1	0.897648	0	3	No	-866.827	8359.05	-1.991	0.30962	0.00034203	0.000283046	-0.942878	-0.829117	-0.30866	-0.54
	117	4	7	50	69	0.649273	0.649882	4	1.19421	0	3	No	-1294.84	10883.1	-2.557	0.241381	0.000273767	0.000259517	-2.08229	-0.895754	-0.382059	-0.825
	118	4	8	49	74	0.520492	0.590855	1	0.851007	0	3	No	-711.775	7521.82	-1.655	0.315735	0.000461474	6.95578e-05	-0.840775	-0.712516	-0.974635	-0.895
	119	4	9	26	52	0.637638	0.620091	1	0.963725	0	2	No	-541.047	6089.89	-1.441	0.25399	0.00136641	0.000506295	-1.87176	0.170881	0.387766	-0.108
	120	4	10	28	44	0.649882	0.620529	1	0.87449	0	1	No	-546.211	5721.32	-1.687	0.271092	0.00202287	0.000687632	-1.5862	0.811708	0.953446	0.417
	121	4	11	36	30	0.608453	0.601289	1	0.65472	3	1	No	-497.05	5254.4	-1.654	0.308127	0.00194702	0.000132068	-0.96781	0.737666	-0.779634	-0.514
	122	4	12	38	35	0.637816	0.617118	4	0.651274	0	0	No	-583.536	5965.02	-1.774	0.31519	0.00319713	8.50936e-05	-0.849876	1.95802	-0.926171	-0.334
	123	4	13	39	31	0.48141	0.632962	1	1.59814	0	1	No	-448.225	4812	-1.601	0.294174	0.00340833	6.56644e-05	-1.2008	2.16419	-0.98678	-0.399
	124	4	14	21	72	0.500992	0.642651	6	1.58008	2	1	No	-502.03	8727.36	-0.282	0.270694	0.00138015	0.000249878	-1.59284	0.18429	-0.412125	-0.529
	125	4	15	34	46	0.576216	0.572498	4	0.640763	0	1	No	-485.163	5305.32	-1.538	0.303337	0.00367175	0.00049622	-1.0478	2.42133	0.356336	0.489
	126	4	16	34	46	0.591377	0.610822	1	0.60001	0	0	No	-547.269	5705.57	-1.703	0.30437	0.00410266	0.000152437	-1.03054	2.84199	-0.716094	-0.067
	127	4	17	33	54	0.62704	0.635481	1	0.756685	1	0	No	-649.451	6666.51	-1.759	0.3112	0.00352121	0.000156135	-0.916507	2.27438	-0.704557	-0.151
	128	4	18	38	69	0.586401	0.542321	5	1.38	0	0	No	-552.763	6569.11	-1.268	0.34739	0.00247367	0.000229529	-0.31222	1.25178	-0.475606	-0.097
	129	4	19	41	73	0.629225	0.644947	1	1.56143	0	0	No	-871.445	8816.86	-1.811	0.341439	0.000605047	0.000208276	-0.411585	-0.57236	-0.541902	-0.522
	130	4	20	31	74	0.626284	0.648737	1	1.56134	3	0	No	-760.687	8675.04	-1.399	0.259937	0.00345832	0.000241971	-1.77246	2.21299	-0.436793	-0.174
	131	5	1	46	74	0.626699	0.648353	1	0.648989	0	2	No	-985.829	9578.67	-1.962	0.29114	2.6478e-05	0.000291384	-1.25144	-1.13716	-0.282648	-0.647
	132	5	2	46	57	0.626433	0.649873	1	0.649007	2	1	No	-892.173	8480.85	-2.047	0.322012	0.000119673	0.000138177	-0.735975	-1.04618	-0.760576	-0.813
	133	5	3	49	72	0.61749	0.624677	5	0.635176	3	0	No	-967.806	9392.77	-1.967	0.273357	0.000517451	0.000939444	-1.54837	-0.657871	1.73897	0.602
	134	5	4	43	71	0.61748	0.623882	5	0.632875	3	0	No	-869.424	8759.45	-1.827	0.325222	0.0017245	0.000163262	-0.682367	0.520441	-0.682326	-0.442
	135	5	5	49	72	0.621413	0.624593	6	1.45957	1	3	No	-1391.14	11945.5	-2.463	0.231257	0.000484069	0.000642553	-2.25133	-0.690459	0.812821	-0.101
	136	5	6	49	65	0.572468	0.630463	2	0.608352	3	0	No	-836.868	8207.03	-1.927	0.315253	0.000806529	0.000146825	-0.84882	-0.375675	-0.733601	-0.685
	137	5	7	49	59	0.627969	0.640868	1	0.656708	0	1	No	-888.982	8590.95	-1.983	0.304308	0.000781021	0.000111604	-1.03158	-0.400576	-0.84347	-0.793
	138	5	8	50	60	0.646268	0.613592	2	1.59823	2	2	No	-1113.18	10040.5	-2.257	0.253394	0.000101132	0.000187273	-1.88171	-1.06428	-0.607424	-0.954
	139	5	9	49	53	0.626671	0.643235	1	0.991777	2	0	No	-958.338	9332.18	-1.954	0.296612	0.000475432	8.05796e-05	-1.16009	-0.69889	-0.940252	-0.936
	140	5	10	49	52	0.635445	0.637713	4	0.998718	1	3	No	-1069.87	9131.93	-2.489	0.290127	0.000523242	0.00012889	-1.26837	-0.652218	-0.789548	-0.858
	141	5	11	49	74	0.637561	0.621382	1	1.50461	0	3	No	-1054.11	10058.7	-2.032	0.234163	0.000286196	0.00026012	-2.20281	-0.883621	-0.380176	-0.845
	142	5	12	49	74	0.570197	0.622142	5	1.5518	0	3	No	-1175.35	10474.2	-2.306	0.238623	0.000907211	0.000499211	-2.12833	-0.27739	0.365667	-0.262
	143	5	13	49	64	0.64581	0.649389	6	0.844118	3	3	No	-1272.1	10723.6	-2.544	0.260115	0.000357265	0.000824395	-1.76949	-0.814245	1.38008	0.311
	144	5	14	50	64	0.56663	0.649733	5	1.55443	1	3	No	-1289.56	10974.8	-2.502	0.250471	4.82853e-05	0.000299605	-1.9305	-1.11587	-0.257002	-0.763
	145	5	15	46	72	0.604741	0.64157	6	0.630926	1	2	No	-958.34	9340.19	-1.951	0.299658	0.000117677	0.000163947	-1.10921	-1.04813	-0.680189	-0.84
	146	5	16	50	72	0.604444	0.646062	5	1.59516	1	3	No	-1476.43	12177.2	-2.641	0.233896	0.00165891	0.000530342	-2.20727	0.456417	0.462779	-0.073
	147	5	17	50	68	0.610685	0.640941	2	0.722842	1	3	No	-996.686	9411.25	-2.073	0.287881	0.00118579	0.000307999	-1.30586	-0.00544721	-0.230817	-0.401
	148	5	18	50	67	0.608396	0.612214	2	0.859168	2	3	No	-962.282	9117.77	-2.059	0.28427	0.00078294	0.000239249	-1.36616	-0.398702	-0.445285	-0.62
	149	5	19	38	50	0.65	0.606747	6	0.845352	2	3	No	-872.017	8064.66	-2.155	0.283281	0.00017049	0.000494386	-1.38267	-0.996573	0.350616	-0.265
	150	5	20	38	48	0.65	0.593193	4	0.839599	3	0	No	-733.262	7084.81	-1.984	0.286347	0.00103315	0.000233998	-1.33147	-0.154452	-0.461664	-0.574
	151	6	1	47	70	0.649626	0.600343	4	1.49658	0	2	No	-1112.11	9855.42	-2.33	0.244342	0.00047133	0.00112624	-2.03285	-0.702895	2.32168	0.846
	152	6	2	47	68	0.634432	0.600383	3	1.2784	0	3	No	-1048.88	9375.45	-2.294	0.261381	0.000604135	0.000558393	-1.74835	-0.573252	0.550284	-0.134
	153	6	3	50	60	0.643426	0.641276	4	1.23782	1	3	No	-1275.21	10466.4	-2.663	0.257063	0.000374402	0.00040032	-1.82044	-0.797515	0.0571775	-0.489
	154	6	4	50	60	0.605892	0.64751	6	1.08081	1	2	No	-1135.84	9764.54	-2.458	0.277302	0.000929586	0.000260665	-1.48251	-0.255548	-0.378476	-0.575
	155	6	5	45	52	0.64991	0.585165	3	1.59753	2	0	No	-862.362	8198.7	-2.046	0.288601	0.000888042	0.000245411	-1.29385	-0.296103	-0.426061	-0.574
	156	6	6	50	67	0.608111	0.634545	4	1.39997	1	3	No	-1280.1	10708.8	-2.577	0.248039	0.00019363	0.00045359	-1.97111	-0.973984	0.223352	-0.455
	157	6	7	49	63	0.648889	0.643621	4	1.2592	1	2	No	-1218.68	10264.6	-2.547	0.253681	0.000137342	0.000554117	-1.87691	-1.02893	0.536946	-0.259
	158	6	8	49	57	0.647649	0.649925	5	1.33704	1	1	Yes, Design D	-1187.43	9858.61	-2.611	0.257158	1.38477e-05	0.000143508	-1.81885	-1.14949	-0.743948	-1.04
	159	6	9	47	74	0.639373	0.611583	5	1.5829	0	0	No	-898.171	9115.58	-1.8	0.292561	0.000654491	0.000608929	-1.22772	-0.524094	0.707931	0.074
	160	6	10	47	71	0.639331	0.641658	4	1.5966	0	1	No	-1132.97	9941.67	-2.371	0.234749	0.000696747	0.000257072	-2.19302	-0.482843	-0.389685	-0.769
	161	6	11	50	60	0.646068	0.6494	6	1.53754	2	1	No	-1375.6	11458.2	-2.597	0.240672	0.000313437	0.000729863	-2.09413	-0.857029	1.08518	0.061
	162	6	12	50	70	0.572408	0.645738	5	0.601204	3	2	No	-971.745	9260.53	-2.037	0.301404	0.000202262	0.000335724	-1.08007	-0.965557	-0.144331	-0.496
	163	6	13	49	57	0.634906	0.642377	6	1.38269	1	0	No	-1073.11	9214.97	-2.463	0.261495	0.000319376	0.000232911	-1.74644	-0.851231	-0.465056	-0.799
	164	6	14	50	61	0.63866	0.633613	6	1.525	0	3	No	-1291.72	11223.8	-2.413	0.241549	0.00061329	0.000667595	-2.07949	-0.564314	0.89094	0.006
	165	6	15	39	46	0.624729	0.621713	6	1.38288	0	3	No	-872.121	8416.48	-1.988	0.265276	0.000984477	0.000175635	-1.68331	-0.201963	-0.643727	-0.763
	166	6	16	50	54	0.65	0.623748	1	1.21487	0	1	No	-947.751	9722.01	-1.761	0.284348	0.000592857	0.00013063	-1.36485	-0.58426	-0.784119	-0.86
	167	6	17	47	68	0.60612	0.596669	1	1.39721	2	3	No	-931.555	8969.44	-1.997	0.271219	0.0013513	0.000185445	-1.58407	0.156131	-0.613124	-0.653
	168	6	18	49	60	0.648918	0.616712	6	1.58151	3	3	No	-1529.65	13553.6	-2.33	0.233231	0.000850836	0.000939108	-2.21837	-0.332423	1.73792	0.533
	169	6	19	49	51	0.601421	0.649232	3	1.53299	3	1	No	-1129.63	9518.83	-2.545	0.271099	0.000450322	0.000151512	-1.58609	-0.723402	-0.718979	-0.893
	170	6	20	44	62	0.644276	0.646428	2	0.86844	3	3	No	-1011.89	9292.27	-2.184	0.305175	0.000163576	0.000203766	-1.01711	-1.00332	-0.555972	-0.738
	171	7	1	50	42	0.549705	0.642587	1	1.5279	1	0	No	-698.02	7136.13	-1.773	0.296765	0.000133293	0.000410305	-1.15753	-1.03289	0.0883242	-0.385
	172	7	2	47	74	0.636762	0.648331	5	1.44441	3	2	No	-1522.76	12555.4	-2.642	0.229513	0.00017628	0.000350392	-2.28045	-0.990921	-0.098574	-0.713
	173	7	3	49	54	0.568026	0.64632	4	0.601313	0	3	No	-817.957	7822.36	-2.023	0.333614	0.000438805	0.000228948	-0.542242	-0.734646	-0.477417	-0.542
	174	7	4	47	57	0.638037	0.642838	6	1.39968	1	3	No	-1275.79	10990.3	-2.45	0.256045	0.000461473	0.000319585	-1.83744	-0.712517	-0.194674	-0.627
	175	7	5	50	74	0.543525	0.644936	1	0.634863	0	3	No	-884.586	8641.5	-1.942	0.311303	0.000306376	0.000166547	-0.914787	-0.863922	-0.672078	-0.759
	176	7	6	50	51	0.618636	0.597405	5	1.48623	0	0	No	-748.794	7643.13	-1.779	0.349082	0.000366555	0.000238202	-0.283975	-0.805176	-0.448548	-0.487
	177	7	7	48	53	0.621368	0.636706	4	1.39394	0	2	No	-1006.63	8931.72	-2.324	0.282671	6.80337e-05	0.00011061	-1.39286	-1.09659	-0.846573	-1.006
	178	7	8	46	65	0.52944	0.646476	3	0.636206	0	2	No	-779.222	7627.86	-1.934	0.358283	0.00105232	0.000122785	-0.130347	-0.135739	-0.808593	-0.538
	179	7	9	50	62	0.591178	0.633712	5	1.06599	0	1	No	-935.36	8686.41	-2.139	0.287281	0.00140679	0.000141079	-1.31588	0.210293	-0.751524	-0.672
	180	7	10	50	65	0.649943	0.615169	3	0.892999	3	1	No	-1044.91	9695.02	-2.142	0.271098	0.000496095	0.000875453	-1.5861	-0.678719	1.53935	0.471
	181	7	11	48	58	0.55977	0.636857	5	0.606263	1	0	No	-784.982	7673.71	-1.939	0.347087	0.000729775	0.000149723	-0.31728	-0.450602	-0.724558	-0.588
	182	7	12	49	59	0.637178	0.61889	6	1.31078	0	2	No	-1127.42	9559.36	-2.518	0.259851	7.27605e-05	0.000265634	-1.77389	-1.09198	-0.362975	-0.791
	183	7	13	50	58	0.540666	0.649999	4	1.59685	1	3	No	-1158.03	9895.45	-2.484	0.270562	0.000355813	0.000251361	-1.59504	-0.815662	-0.407499	-0.727
	184	7	14	49	72	0.626804	0.631751	1	1.56935	0	1	No	-983.909	9522.71	-1.977	0.234936	0.000386341	0.000548596	-2.18991	-0.78586	0.519722	-0.283
	185	7	15	50	73	0.596458	0.649223	3	1.29001	2	2	No	-1200.35	10507.4	-2.381	0.256424	0.000505646	0.000387516	-1.83111	-0.669395	0.0172347	-0.49
	186	7	16	47	48	0.647521	0.625043	3	1.40327	0	3	No	-1030.76	8812.12	-2.482	0.285566	0.00068711	0.000118586	-1.34451	-0.492252	-0.821692	-0.86
	187	7	17	50	62	0.574359	0.641738	1	0.82902	1	0	No	-857.093	8308.44	-1.971	0.315115	0.000359161	0.000114605	-0.851132	-0.812393	-0.834112	-0.833
	188	7	18	50	72	0.624242	0.649996	4	1.59662	1	0	No	-1156.43	10302.6	-2.308	0.232536	0.000308028	0.000570452	-2.22998	-0.862309	0.587903	-0.266
	189	7	19	50	60	0.644865	0.649741	6	1.0242	1	1	No	-1128.67	9907.49	-2.37	0.268119	0.00162347	0.000364514	-1.63583	0.42182	-0.0545191	-0.276
	190	7	20	48	67	0.562784	0.636805	3	1.3603	0	3	Yes, Design F	-1007.68	9076.22	-2.262	0.278811	0.000189351	7.43922e-05	-1.45731	-0.978161	-0.959554	-1.064
	191	8	1	44	72	0.64332	0.642245	4	0.995648	0	1	No	-987.501	9544.55	-1.982	0.288353	0.000461727	0.000254498	-1.29799	-0.712269	-0.397714	-0.641
	192	8	2	50	61	0.570614	0.643241	6	1.30286	1	3	No	-1209.08	10343.5	-2.48	0.271643	7.85345e-05	0.000150985	-1.577	-1.08634	-0.720622	-0.965
	193	8	3	48	62	0.611162	0.626871	6	1.03495	0	0	No	-852.181	8375.87	-1.919	0.32968	0.000602236	0.000281327	-0.607942	-0.575105	-0.31402	-0.425
	194	8	4	49	60	0.648221	0.643791	1	1.01401	3	1	No	-1023.25	9553.45	-2.117	0.27253	0.000134173	0.000473213	-1.56219	-1.03203	0.284566	-0.348
	195	8	5	49	65	0.65	0.629937	6	0.831752	1	2	No	-1084.92	9850.96	-2.229	0.264927	0.000568396	0.000585568	-1.68913	-0.608139	0.635056	-0.078
	196	8	6	36	38	0.649012	0.633892	3	1.41048	0	2	No	-782.046	6906.68	-2.344	0.256144	0.001367	0.000140354	-1.83579	0.171454	-0.753785	-0.785
	197	8	7	49	69	0.477561	0.646748	5	1.46425	1	2	No	-997.233	8880.75	-2.309	0.294837	0.000969942	8.03034e-05	-1.18973	-0.216152	-0.941114	-0.846
	198	8	8	50	72	0.646565	0.634874	4	1.4099	1	1	No	-1242.28	10744.1	-2.433	0.232633	0.00060115	0.000672469	-2.22836	-0.576165	0.906145	-0.017
	199	8	9	50	51	0.638713	0.639622	4	1.53209	2	3	No	-1303.45	11038.2	-2.524	0.254804	0.00039087	0.000166947	-1.85816	-0.781439	-0.670829	-0.93
	200	8	10	40	58	0.574604	0.649025	1	1.58219	0	3	No	-815.567	7852.31	-1.997	0.265226	0.00149426	0.000206177	-1.68414	0.295681	-0.548451	-0.607
	201	8	11	42	71	0.596583	0.610096	2	0.914945	0	2	No	-963.15	9631.64	-1.854	0.316924	0.00114577	0.00015584	-0.820921	-0.0445118	-0.705479	-0.596
	202	8	12	50	62	0.633707	0.602692	3	1.41045	2	3	No	-1166.42	10242.3	-2.368	0.25034	0.00117116	0.00046259	-1.93269	-0.0197289	0.251429	-0.24
	203	8	13	48	66	0.64719	0.639245	6	0.82879	0	1	No	-1015.69	9537.86	-2.095	0.285788	0.00029639	0.000253622	-1.34081	-0.87367	-0.400447	-0.683
	204	8	14	50	39	0.639528	0.648483	1	0.64067	0	3	No	-803.065	7999.36	-1.869	0.334873	0.000466839	0.000200649	-0.521224	-0.707279	-0.565695	-0.585
	205	8	15	48	62	0.590773	0.65	4	1.58479	0	3	Yes, Design E	-1147.64	10019.8	-2.392	0.259683	0.00022029	0.000105022	-1.7767	-0.947958	-0.864003	-1.063
	206	8	16	40	72	0.613495	0.63882	2	0.618615	1	1	No	-801.272	7542.69	-2.085	0.333253	0.000759542	9.95063e-05	-0.548273	-0.421543	-0.88121	-0.723
	207	8	17	44	67	0.598098	0.639683	2	1.44373	3	3	No	-1177.85	10848.5	-2.172	0.280643	0.000402719	0.000296638	-1.42672	-0.769872	-0.266258	-0.599
	208	8	18	50	48	0.649441	0.623642	5	1.39612	2	1	No	-1125.7	9757.44	-2.423	0.272742	0.000557774	0.00054974	-1.55865	-0.618509	0.523292	-0.121
	209	8	19	48	52	0.613095	0.573172	6	1.5511	0	3	No	-905.02	9358.8	-1.732	0.268414	0.00163607	9.75448e-05	-1.63091	0.434115	-0.887329	-0.772
	210	8	20	46	55	0.649242	0.613208	6	1.39492	2	3	No	-1242.95	11081.4	-2.305	0.261039	1.04045e-05	0.000190102	-1.75406	-1.15285	-0.598597	-0.941
	211	9	1	45	56	0.625427	0.648239	1	1.57249	0	2	No	-906.739	8774.34	-1.978	0.288142	0.000725267	7.6547e-05	-1.30151	-0.455003	-0.952832	-0.923
	212	9	2	44	68	0.646897	0.640626	4	1.28658	0	2	No	-1071.58	9808.01	-2.197	0.278579	0.00085714	0.000411114	-1.46119	-0.326269	0.0908499	-0.303
	213	9	3	49	44	0.629161	0.642641	5	1.53962	0	3	No	-1032.36	9653.22	-2.111	0.267805	0.00139985	0.000100921	-1.64109	0.203523	-0.876797	-0.814
	214	9	4	48	54	0.57858	0.643892	4	1.12402	2	2	No	-1000	8792.4	-2.363	0.303245	0.000211453	0.000195128	-1.04932	-0.956586	-0.582918	-0.751
	215	9	5	50	55	0.64397	0.649091	2	1.04516	0	3	No	-1027.76	9316.64	-2.236	0.281074	0.00058755	0.000254465	-1.41952	-0.589442	-0.397818	-0.64
	216	9	6	47	72	0.590583	0.649992	3	0.964171	1	2	No	-1015.02	9320.47	-2.184	0.284504	0.00122432	0.000323872	-1.36225	0.0321723	-0.181301	-0.375
	217	9	7	49	74	0.605813	0.624854	2	1.17977	2	2	No	-1085.35	9769.09	-2.265	0.246808	0.000136515	0.000485621	-1.99167	-1.02974	0.323274	-0.41
	218	9	8	50	68	0.599659	0.642844	5	1.46314	2	3	No	-1434.82	11930.2	-2.604	0.242927	0.000902821	0.000750513	-2.05647	-0.281675	1.1496	0.222
	219	9	9	45	69	0.642271	0.646898	4	1.43047	2	0	No	-1112.03	10047.8	-2.249	0.258381	0.000242439	0.000441659	-1.79844	-0.926337	0.186133	-0.433
	220	9	10	50	34	0.648426	0.648405	6	1.11693	2	2	No	-1026.16	9277.93	-2.247	0.300836	0.000406912	0.000215241	-1.08955	-0.765779	-0.520176	-0.683
	221	9	11	40	63	0.648576	0.590654	4	1.59925	2	3	No	-1119.12	10578.7	-2.069	0.266461	0.00115995	0.000164555	-1.66352	-0.0306652	-0.678292	-0.746
	222	9	12	47	31	0.636317	0.64883	6	1.55464	2	1	No	-896.926	9224.84	-1.752	0.273731	0.0013932	0.000129448	-1.54214	0.19703	-0.787806	-0.742
	223	9	13	47	57	0.615303	0.630548	1	1.58506	1	2	No	-914.266	8696.77	-2.044	0.283124	0.000911	8.03844e-05	-1.38529	-0.273691	-0.940861	-0.896
	224	9	14	45	52	0.576961	0.64477	4	0.627398	0	0	No	-733.295	7169.4	-1.939	0.349756	0.00051348	0.000141243	-0.272721	-0.661748	-0.751013	-0.638
	225	9	15	46	35	0.622268	0.649771	5	1.30717	2	1	No	-921.506	8386.75	-2.22	0.283016	0.000743008	0.00014567	-1.3871	-0.437684	-0.737202	-0.807
	226	9	16	44	52	0.628129	0.638063	2	1.57089	1	3	No	-1004.22	8969.13	-2.297	0.279591	0.000110666	0.00015531	-1.44429	-1.05497	-0.707131	-0.924
	227	9	17	48	71	0.624926	0.639452	6	0.600568	0	0	No	-961.329	9325.85	-1.968	0.304211	0.000143864	0.000605807	-1.0332	-1.02257	0.698192	0.008
	228	9	18	47	60	0.628199	0.648245	1	0.645011	0	3	No	-914.085	8683.37	-2.049	0.308665	0.000777244	0.000349195	-0.958826	-0.404263	-0.102308	-0.334
	229	9	19	49	62	0.615246	0.634449	6	1.08247	2	2	No	-1168.34	10077.1	-2.444	0.269095	1.70712e-05	0.000254797	-1.61953	-1.14634	-0.39678	-0.791
	230	9	20	35	42	0.632695	0.649367	1	1.59608	1	3	No	-844.12	8117.55	-2.002	0.266658	0.00194945	0.000279503	-1.66023	0.740036	-0.31971	-0.376
	231	10	1	37	67	0.647153	0.633567	6	1.57569	2	3	No	-1322.16	12203.1	-2.163	0.272673	0.000681798	0.0002352	-1.55979	-0.497437	-0.457916	-0.686
	232	10	2	49	50	0.632033	0.63748	2	0.632566	0	0	No	-829.819	8067.08	-1.96	0.338301	0.000599075	0.00015963	-0.463992	-0.57819	-0.693656	-0.625
	233	10	3	50	73	0.483183	0.635251	1	1.56853	2	1	No	-798.561	8070.64	-1.815	0.299867	0.000506514	0.000181618	-1.10573	-0.668548	-0.625064	-0.73
	234	10	4	32	74	0.649505	0.574523	5	0.60001	1	3	No	-640.552	7968.75	-1.128	0.29843	0.00125286	5.05579e-05	-1.12973	0.0600294	-1.0339	-0.834
	235	10	5	48	42	0.64981	0.649704	3	1.15238	0	2	No	-907.654	8386.07	-2.159	0.305255	7.89854e-05	7.94569e-05	-1.01576	-1.0859	-0.943755	-0.987
	236	10	6	48	70	0.638842	0.642545	3	1.46285	2	1	No	-1183.73	10616.3	-2.28	0.24343	0.000151187	0.000317397	-2.04808	-1.01542	-0.201501	-0.734
	237	10	7	38	66	0.625739	0.63988	5	1.51079	3	2	No	-1239.53	11246.6	-2.232	0.254778	0.000505067	0.000368656	-1.8586	-0.669961	-0.0415985	-0.531
	238	10	8	45	59	0.561281	0.634403	3	1.05131	0	1	No	-771.191	7443.72	-1.988	0.312477	0.000265524	7.81783e-05	-0.895173	-0.903802	-0.947743	-0.928
	239	10	9	43	72	0.591665	0.64662	6	1.39942	2	2	No	-1194.15	10993.4	-2.174	0.279416	0.000790309	0.000238597	-1.44721	-0.391509	-0.447319	-0.636
	240	10	10	37	69	0.637619	0.622489	1	1.46327	1	2	No	-822.387	8562.75	-1.708	0.320016	0.00386346	0.000130275	-0.769291	2.60849	-0.785227	-0.103
	241	10	11	48	37	0.590927	0.642626	1	0.619409	1	0	No	-681.198	6937.69	-1.787	0.339623	0.000658849	0.000170997	-0.441911	-0.51984	-0.658195	-0.587
	242	10	12	48	69	0.557971	0.635317	2	1.59789	1	2	No	-1001.39	9170.79	-2.195	0.273705	0.000559269	0.000111429	-1.54257	-0.617049	-0.844018	-0.938
	243	10	13	40	73	0.648165	0.649152	2	0.779549	1	3	No	-1020.63	9920.08	-1.961	0.306122	0.000555224	0.000219377	-1.00128	-0.620998	-0.507273	-0.629
	244	10	14	46	72	0.645178	0.601863	4	1.5806	0	1	No	-993.677	9495.88	-2.026	0.254063	0.000234021	0.0002049	-1.87053	-0.934555	-0.552434	-0.892
	245	10	15	36	41	0.649322	0.594889	4	1.40815	1	3	No	-831.568	7813.02	-2.092	0.248836	0.000547456	0.00028053	-1.9578	-0.628581	-0.316509	-0.707
	246	10	16	48	55	0.617279	0.648912	1	1.55555	0	3	No	-1421.58	14167.2	-1.867	0.278251	0.00024274	0.000124306	-1.46666	-0.926043	-0.803848	-0.961
	247	10	17	43	71	0.649179	0.641141	4	1.34832	0	2	No	-1083.55	9920.24	-2.196	0.276822	0.00177124	0.000621583	-1.49053	0.566074	0.747405	0.264
	248	10	18	50	62	0.628674	0.617797	2	1.54678	2	2	No	-1096.68	9913.8	-2.247	0.251839	0.000106302	0.000278493	-1.90767	-1.05923	-0.322862	-0.787
	249	10	19	47	30	0.646254	0.642657	3	1.59484	0	0	No	-647.459	6967.01	-1.593	0.347404	0.000334258	0.00257178	-0.311996	-0.836704	6.83104	3.869
	250	10	20	46	74	0.649998	0.639412	1	1.13029	3	3	No	-1088.23	10376	-2.035	0.271174	0.000728008	0.000325464	-1.58482	-0.452327	-0.176336	-0.513
	251	11	1	50	68	0.64949	0.62925	4	1.10662	3	1	No	-1244.85	10642.5	-2.482	0.250383	8.74916e-05	0.000709719	-1.93198	-1.0776	1.02235	0.011
	252	11	2	48	63	0.636869	0.638893	1	1.56117	1	1	No	-966.232	9382.47	-1.965	0.256621	0.000298221	0.000118686	-1.82782	-0.871883	-0.821379	-1.033
	253	11	3	48	74	0.629669	0.629742	4	1.30421	1	1	No	-1111.23	10207.3	-2.182	0.249768	0.000598692	0.000424005	-1.94225	-0.578565	0.131064	-0.426
	254	11	4	50	73	0.621864	0.649428	6	1.28205	3	3	Yes, Design A	-1638.73	12959.9	-2.833	0.242995	0.00102638	0.000791929	-2.05535	-0.16106	1.2788	0.324
	255	11	5	46	72	0.642091	0.647215	5	1.43698	0	0	No	-989.961	9569.9	-1.982	0.307765	0.000244402	0.000652457	-0.973861	-0.924421	0.843717	0.127
	256	11	6	42	57	0.64011	0.611617	6	1.39148	2	0	No	-1004.49	8927.88	-2.317	0.28711	0.000287769	0.000144435	-1.31874	-0.882086	-0.741055	-0.885
	257	11	7	48	67	0.644888	0.621126	2	1.59252	2	0	No	-1013.27	9713.08	-2.014	0.252184	0.000275712	0.000258811	-1.90191	-0.893856	-0.384261	-0.79
	258	11	8	48	73	0.644945	0.649793	4	1.37115	3	0	No	-1290.08	11165	-2.43	0.241447	0.000229621	0.000409273	-2.08118	-0.938849	0.0851054	-0.553
	259	11	9	50	59	0.641343	0.63113	6	1.54026	0	0	No	-915.365	8862.36	-1.976	0.316276	0.000478576	9.91115e-05	-0.831744	-0.695821	-0.882442	-0.835
	260	11	10	49	59	0.589116	0.6073	4	1.31976	0	0	No	-755.369	7649.47	-1.808	0.342372	0.00173681	0.000264851	-0.396006	0.532464	-0.365417	-0.192
	261	11	11	50	39	0.649431	0.616423	6	0.785803	0	3	No	-889.625	8211.71	-2.163	0.326434	0.000441247	7.20782e-05	-0.662137	-0.732261	-0.966772	-0.859
	262	11	12	49	69	0.637906	0.649447	4	1.44511	3	2	No	-1443.86	11873.1	-2.654	0.234531	1.81237e-05	0.000532077	-2.19666	-1.14531	0.468194	-0.387
	263	11	13	35	48	0.649998	0.639012	2	1.45579	2	1	No	-830.191	7609.1	-2.191	0.314219	0.00684362	0.000297416	-0.866099	5.5177	-0.263831	0.772
	264	11	14	42	64	0.469856	0.644686	1	1.58853	2	2	No	-748.995	7209.61	-1.998	0.277634	0.0018966	0.000134187	-1.47697	0.688448	-0.773025	-0.622
	265	11	15	37	46	0.567678	0.585913	6	1.38547	0	3	No	-685.527	7313.99	-1.622	0.300037	0.00233078	6.94689e-05	-1.1029	1.11229	-0.974912	-0.583
	266	11	16	49	68	0.641953	0.596872	1	1.46483	0	2	No	-923.37	9138.43	-1.893	0.246884	0.000241571	0.000159635	-1.99041	-0.927184	-0.693639	-1
	267	11	17	35	60	0.633578	0.646183	2	1.53853	2	0	No	-880.851	9550.66	-1.567	0.325051	0.00575251	0.000276202	-0.68523	4.45256	-0.330009	0.555
	268	11	18	50	68	0.624573	0.64055	4	1.51933	1	3	No	-1380.38	11414.3	-2.629	0.236279	1.19787e-05	0.000625496	-2.16747	-1.15131	0.759613	-0.208
	269	11	19	38	48	0.645899	0.649337	5	1.33636	0	0	No	-742.378	7178.48	-1.981	0.303208	0.00262265	0.000177722	-1.04995	1.39721	-0.637217	-0.313
	270	11	20	38	65	0.594745	0.647271	1	0.600039	0	1	No	-760.129	7716.93	-1.799	0.306174	0.00185626	0.000123157	-1.00042	0.649062	-0.807431	-0.555
	271	12	1	39	63	0.635168	0.649592	4	1.54594	3	2	No	-1229.9	10796.7	-2.369	0.287529	0.000752052	0.000251369	-1.31175	-0.428855	-0.407476	-0.593
	272	12	2	47	55	0.636922	0.624827	6	1.30872	1	2	No	-1149.99	9732.73	-2.526	0.276844	0.00055231	0.000377704	-1.49015	-0.623842	-0.0133734	-0.431
	273	12	3	49	65	0.625392	0.649808	4	1.51042	0	3	No	-1315.32	10641.5	-2.728	0.239453	0.000844635	0.000342558	-2.11448	-0.338477	-0.123011	-0.564
	274	12	4	42	52	0.617751	0.649523	1	1.59025	1	2	No	-857.06	8239.61	-2.003	0.281213	0.000128232	0.000128886	-1.4172	-1.03782	-0.78956	-0.965
	275	12	5	47	61	0.65	0.618638	6	1.32787	3	2	No	-1363.14	11412.1	-2.574	0.257312	0.000115507	0.000850071	-1.81628	-1.05025	1.46017	0.303
	276	12	6	50	57	0.613797	0.649989	1	1.31927	2	1	No	-974.694	9638.55	-1.896	0.278258	0.000502479	0.000326156	-1.46654	-0.672488	-0.174179	-0.532
	277	12	7	35	68	0.643045	0.628657	2	1.49069	3	2	No	-915.451	10937.5	-1.251	0.300292	0.00327176	0.000127045	-1.09864	2.03087	-0.795305	-0.291
	278	12	8	49	59	0.646238	0.619086	5	1.30388	0	3	No	-1221.31	9975.07	-2.685	0.254668	0.000212209	0.000337359	-1.86043	-0.955847	-0.139228	-0.647
	279	12	9	32	68	0.596622	0.645382	1	1.53356	0	3	No	-734.663	8037.77	-1.536	0.232788	0.000164608	0.000712288	-2.22577	-1.00231	1.03036	-0.027
	280	12	10	36	61	0.646592	0.568933	6	1.576	1	2	No	-915.418	9393.27	-1.76	0.25494	0.0016475	0.000512476	-1.85589	0.445278	0.407049	-0.038
	281	12	11	50	64	0.631978	0.639333	4	1.25089	0	2	No	-1131.85	9866.38	-2.399	0.26212	0.00061059	0.000326543	-1.73601	-0.566949	-0.172969	-0.564
	282	12	12	50	53	0.609357	0.63061	1	1.59581	0	1	Yes, Design J	-843.962	8714.97	-1.737	0.27858	0.000174335	3.07949e-05	-1.46117	-0.99282	-1.09556	-1.148
	283	12	13	39	45	0.626	0.64967	2	0.862336	3	3	No	-814.173	7362.88	-2.246	0.297101	0.00129109	0.0001003	-1.15191	0.0973486	-0.878734	-0.738
	284	12	14	40	37	0.588277	0.632092	1	1.57587	0	0	No	-586.313	5941.57	-1.805	0.315878	0.00215072	0.000140365	-0.838385	0.936521	-0.753751	-0.433
	285	12	15	48	72	0.619524	0.649326	1	1.29373	0	2	No	-1017.23	9747.54	-2.016	0.261405	0.000476214	0.000408397	-1.74793	-0.698127	0.0823737	-0.44
	286	12	16	50	73	0.604712	0.649113	6	1.34547	1	3	No	-1446.17	11828.7	-2.678	0.244038	0.000237942	0.000747124	-2.03792	-0.930727	1.13903	0.09
	287	12	17	50	74	0.600047	0.636127	2	0.815778	1	0	No	-964.406	9373.29	-1.961	0.27737	0.00107922	0.000377398	-1.48136	-0.109472	-0.0143289	-0.327
	288	12	18	47	54	0.649502	0.64961	1	1.50444	3	1	No	-954.731	9506.33	-1.87	0.273357	0.000781146	0.000132218	-1.54838	-0.400454	-0.779168	-0.857
	289	12	19	48	72	0.566909	0.649627	4	1.5442	3	3	No	-1374.97	11836.4	-2.453	0.242832	0.000827238	0.000268137	-2.05806	-0.355459	-0.355166	-0.696
	290	12	20	34	30	0.579661	0.649609	2	1.40224	1	0	Yes, Design H	-538.103	5294.99	-1.914	0.275791	0.000551722	3.64397e-05	-1.50773	-0.624417	-1.07795	-1.073
	291	13	1	49	62	0.622122	0.644032	6	1.03733	1	0	No	-1011.51	9107.81	-2.264	0.26664	0.000305948	0.000153782	-1.66053	-0.86434	-0.711898	-0.932
	292	13	2	37	69	0.594105	0.64998	1	0.601641	2	3	No	-773.137	7941.82	-1.756	0.383036	0.00529238	0.000228922	0.282957	4.00339	-0.4775	0.571
	293	13	3	44	56	0.598004	0.63019	1	1.53507	1	1	No	-817.46	7937.5	-1.965	0.292458	0.000407951	8.52242e-05	-1.22944	-0.764765	-0.925763	-0.954
	294	13	4	47	53	0.641504	0.649044	6	1.38688	1	0	No	-1035.47	8923.73	-2.448	0.278397	3.93771e-05	0.000155684	-1.46421	-1.12456	-0.705963	-0.941
	295	13	5	41	67	0.57594	0.588763	6	1.24272	1	3	No	-965.54	9046.55	-2.103	0.288328	0.00116779	0.000241444	-1.2984	-0.0230134	-0.438435	-0.527
	296	13	6	50	44	0.634461	0.649347	1	1.00232	3	2	No	-910.282	8876.23	-1.949	0.312453	0.000288566	7.13347e-05	-0.895581	-0.881307	-0.969092	-0.937
	297	13	7	49	52	0.63873	0.638753	5	1.38461	0	2	No	-1093.88	9335.16	-2.49	0.273535	0.00093786	0.00011773	-1.5454	-0.24747	-0.824362	-0.853
	298	13	8	47	57	0.640284	0.641099	4	1.37349	3	3	Yes, Design B	-1370.78	11003.8	-2.764	0.261854	0.000642038	0.000288222	-1.74045	-0.536251	-0.292512	-0.631
	299	13	9	50	74	0.585972	0.644332	5	1.37169	3	2	No	-1402.64	11781.1	-2.56	0.240502	0.000728203	0.000410544	-2.09697	-0.452137	0.089072	-0.456
	300	13	10	49	62	0.599587	0.64723	6	1.52469	1	0	No	-1080.75	9235.19	-2.484	0.254006	0.00069511	0.000229545	-1.87149	-0.484442	-0.475556	-0.757
	301	13	11	49	74	0.561709	0.646613	4	0.613268	3	3	No	-943.635	9164.04	-1.964	0.290795	0.000448492	0.000573266	-1.25721	-0.725189	0.596681	-0.038
	302	13	12	49	59	0.630986	0.641156	2	1.25294	0	3	No	-1068.82	9272.04	-2.42	0.266641	0.00010357	0.000211048	-1.66052	-1.0619	-0.533257	-0.864
	303	13	13	50	48	0.644116	0.636086	3	1.33835	2	3	No	-1137.57	9808.18	-2.446	0.280126	6.40046e-05	0.000114146	-1.43535	-1.10052	-0.835541	-1.008
	304	13	14	49	58	0.639533	0.640473	6	1.30966	0	3	No	-1229.18	10383.4	-2.535	0.254853	0.000283765	0.000416028	-1.85735	-0.885995	0.106179	-0.485
	305	13	15	50	64	0.62904	0.649722	6	0.869551	0	2	No	-1087.28	9764.68	-2.274	0.277218	0.000481574	0.000286786	-1.48391	-0.692894	-0.296993	-0.614
	306	13	16	50	71	0.644153	0.63786	4	0.840465	2	3	No	-1179.24	10597.8	-2.272	0.262738	0.000329941	0.000716772	-1.72568	-0.840918	1.04435	0.113
	307	13	17	49	66	0.537968	0.617446	4	0.997002	1	0	No	-794.626	7694.68	-1.975	0.318368	0.000328857	6.94635e-05	-0.796817	-0.841977	-0.974929	-0.913
	308	13	18	50	72	0.521065	0.649031	6	0.634935	0	2	No	-866.117	8383.29	-1.977	0.328512	0.000373012	0.000255097	-0.627434	-0.798872	-0.395846	-0.523
	309	13	19	43	63	0.628	0.632293	5	0.634728	3	1	No	-886.147	8604.34	-1.965	0.33442	0.00170885	0.000293426	-0.528786	0.505168	-0.276279	-0.17
	310	13	20	46	69	0.629916	0.648706	3	1.41531	1	0	Yes, Design G	-1019.33	9544.74	-2.106	0.266861	0.000220583	3.48154e-05	-1.65685	-0.947673	-1.08301	-1.071
	311	14	1	46	66	0.648779	0.642929	6	1.275	1	2	No	-1230.95	10736.4	-2.397	0.268439	9.30789e-05	0.000157654	-1.63049	-1.07214	-0.69982	-0.96
	312	14	2	43	73	0.60494	0.641372	6	0.602628	1	3	No	-907.885	9101.61	-1.845	0.327901	0.000833309	0.000319793	-0.637635	-0.349532	-0.194026	-0.314
	313	14	3	50	59	0.52498	0.61833	2	1.1964	1	3	No	-838.779	7841.59	-2.112	0.313735	0.000429451	8.03937e-05	-0.874173	-0.743776	-0.940832	-0.888
	314	14	4	50	66	0.641962	0.635011	6	1.3147	3	0	No	-1323	11027.4	-2.594	0.249407	0.000523767	0.000949789	-1.94827	-0.651706	1.77124	0.543
	315	14	5	49	56	0.632047	0.649222	4	1.54488	3	0	Yes, Design C	-1250.71	10173.7	-2.703	0.251453	0.00023725	0.000189341	-1.91412	-0.931403	-0.600973	-0.93
	316	14	6	31	59	0.645217	0.641655	1	1.25325	1	1	No	-707.96	7327	-1.729	0.271454	0.00226423	0.000132349	-1.58015	1.04733	-0.778757	-0.574
	317	14	7	39	65	0.646165	0.566527	4	1.5711	3	3	No	-1065.83	10680.4	-1.847	0.290761	0.000160643	0.000113676	-1.25778	-1.00619	-0.837009	-0.955
	318	14	8	50	73	0.6436	0.61635	6	1.05056	1	0	No	-1048.36	9937.52	-2.058	0.251236	0.00148883	0.000480524	-1.91773	0.290388	0.307373	-0.141
	319	14	9	42	59	0.64061	0.649208	1	1.54444	0	2	No	-909.227	8703.58	-2.02	0.288568	0.000508301	0.000169336	-1.2944	-0.666804	-0.663378	-0.79
	320	14	10	50	66	0.647008	0.645418	6	1.45228	0	0	No	-1012.38	9606.68	-2.054	0.291444	9.84153e-05	0.000883181	-1.24638	-1.06693	1.56346	0.475
	321	14	11	49	57	0.644985	0.649887	4	1.6	2	1	No	-1284.16	10559.7	-2.654	0.249373	0.000423942	0.000395671	-1.94884	-0.749154	0.0426736	-0.514
	322	14	12	43	56	0.628369	0.621193	1	0.663745	0	2	No	-762.831	7641.3	-1.848	0.349541	0.00196582	0.000284085	-0.276311	0.756018	-0.305419	-0.087
	323	14	13	36	44	0.473062	0.637766	2	0.721314	0	3	No	-498.084	5028.15	-1.819	0.322534	0.00182005	0.00011364	-0.727259	0.613717	-0.83712	-0.525
	324	14	14	49	51	0.649112	0.649871	4	1.37353	3	2	No	-1292.31	10624.2	-2.655	0.258712	0.00080022	0.000174354	-1.79291	-0.381834	-0.647723	-0.824
	325	14	15	49	73	0.544696	0.585853	6	0.62487	2	2	No	-774.205	8063.41	-1.707	0.314455	0.000134863	0.000248391	-0.862147	-1.03135	-0.416766	-0.629
	326	14	16	40	51	0.649999	0.646157	6	1.42919	0	2	No	-1061.76	8948.72	-2.545	0.265264	0.000354978	0.000234368	-1.6835	-0.816477	-0.460508	-0.776
	327	14	17	47	72	0.541883	0.649999	3	0.668514	3	3	No	-889.719	8577.8	-1.992	0.318948	0.000352537	0.00020271	-0.787129	-0.81886	-0.559266	-0.657
	328	14	18	46	53	0.649517	0.649469	1	1.26579	0	1	No	-902.891	8716.81	-1.987	0.29863	0.000588646	0.000154854	-1.12639	-0.588371	-0.708552	-0.768
	329	14	19	49	62	0.647093	0.551186	6	1.26121	2	1	No	-1006.13	9360.39	-2.131	0.260286	0.000373373	0.000657649	-1.76662	-0.79852	0.859913	0.003
	330	14	20	45	73	0.585335	0.611831	6	1.46757	0	0	No	-783.464	8117.1	-1.726	0.343425	0.000227004	0.000503682	-0.378431	-0.941405	0.379616	-0.036
	331	15	1	43	74	0.597582	0.59559	1	1.32325	0	2	No	-793.644	8418.31	-1.642	0.307247	0.000797279	0.000163388	-0.982504	-0.384705	-0.681931	-0.683
	332	15	2	50	73	0.62737	0.646712	4	0.63588	1	3	No	-1078.94	10176.3	-2.077	0.266886	7.91946e-05	0.00074764	-1.65643	-1.0857	1.14064	0.136
	333	15	3	48	74	0.595533	0.569616	1	1.32066	2	3	No	-835.593	8843.33	-1.65	0.273274	0.000895126	0.000150115	-1.54976	-0.289187	-0.723337	-0.802
	334	15	4	49	55	0.629323	0.648755	6	1.51243	0	3	No	-1214.88	10713	-2.35	0.251692	0.000747448	0.000431395	-1.91012	-0.43335	0.154115	-0.376
	335	15	5	46	69	0.514769	0.619678	1	1.45543	1	3	No	-752.532	7886.16	-1.685	0.302643	0.00182259	7.39243e-05	-1.05939	0.616196	-0.961013	-0.665
	336	15	6	50	58	0.639193	0.612459	3	1.40079	2	1	No	-1029.45	9486.06	-2.17	0.262164	0.000911642	0.000205227	-1.73527	-0.273065	-0.551414	-0.733
	337	15	7	48	60	0.649878	0.629591	2	1.55904	2	3	No	-1130.94	10306.1	-2.215	0.254049	1.70195e-05	0.000286168	-1.87077	-1.14639	-0.29892	-0.783
	338	15	8	49	70	0.64991	0.635048	5	0.854304	3	3	No	-1232.44	10782.3	-2.384	0.257325	0.000297708	0.000629721	-1.81606	-0.872384	0.772793	-0.074
	339	15	9	48	66	0.647491	0.638194	2	0.614431	0	2	No	-981.497	9405.35	-2.016	0.296863	0.000196283	0.000711304	-1.15589	-0.971394	1.02729	0.191
	340	15	10	41	67	0.553749	0.649104	1	1.31883	0	3	No	-786.989	7907.22	-1.837	0.297095	0.00078144	0.000155802	-1.15202	-0.400167	-0.705597	-0.734
	341	15	11	49	58	0.649945	0.58333	4	1.36723	0	2	No	-983.491	8892.46	-2.247	0.264816	0.000763382	0.00038869	-1.69099	-0.417795	0.0208974	-0.409
	342	15	12	46	74	0.612639	0.622334	1	1.40526	1	2	No	-933.85	9404.21	-1.828	0.267705	0.00141552	0.000344037	-1.64275	0.218817	-0.118398	-0.356
	343	15	13	47	69	0.635439	0.647246	3	1.4151	0	1	No	-1056.94	9602.17	-2.227	0.249275	0.000739509	0.000154676	-1.95048	-0.4411	-0.709108	-0.904
	344	15	14	50	50	0.64909	0.615233	4	1.1976	0	2	No	-980.776	8836.45	-2.261	0.290968	0.00101091	0.000288345	-1.25431	-0.176156	-0.29213	-0.461
	345	15	15	48	62	0.628426	0.637684	4	1.54964	2	0	No	-1099.15	9788.97	-2.309	0.255419	0.000132362	0.000167405	-1.8479	-1.03379	-0.669399	-0.978
	346	15	16	48	68	0.65	0.649367	6	1.05939	0	3	No	-1262.4	10732	-2.507	0.262913	0.000115371	0.000347527	-1.72277	-1.05038	-0.107509	-0.619
	347	15	17	50	65	0.644001	0.63721	4	1.0504	1	3	No	-1211.37	10372.9	-2.475	0.254826	0.00114828	0.000286962	-1.8578	-0.0420558	-0.296442	-0.558
	348	15	18	49	68	0.617033	0.649999	2	1.59271	0	2	No	-1127.41	9827.79	-2.399	0.240904	0.000170399	0.000514741	-2.09026	-0.996662	0.414113	-0.369
	349	15	19	50	71	0.497128	0.63274	4	0.90878	1	3	No	-887.397	8245.49	-2.136	0.320476	8.10771e-05	0.0001929	-0.761621	-1.08386	-0.589868	-0.723
	350	15	20	46	42	0.627496	0.64497	1	1.57364	1	3	No	-804.455	8292.43	-1.744	0.288275	0.000183466	0.000151855	-1.29929	-0.983906	-0.71791	-0.887
	351	16	1	49	59	0.649445	0.563703	4	1.19751	2	3	No	-1047.34	9446.38	-2.257	0.266881	0.000567838	0.000577835	-1.6565	-0.608684	0.610934	-0.086
	352	16	2	50	64	0.636012	0.616145	4	1.24773	1	1	No	-1073.07	9587.02	-2.296	0.257741	0.000303127	0.000335865	-1.80912	-0.867093	-0.143891	-0.622
	353	16	3	49	70	0.425866	0.580324	3	1.04556	0	0	No	-515.457	5718.04	-1.49	0.388329	0.00026296	0.00014445	0.37134	-0.906305	-0.741009	-0.552
	354	16	4	38	53	0.648675	0.603431	5	1.59087	0	3	No	-1015.47	9127.95	-2.271	0.253497	0.00177349	0.000472326	-1.87999	0.568271	0.2818	-0.093
	355	16	5	50	58	0.634215	0.649952	3	1.13349	1	2	No	-1080.18	9611.56	-2.313	0.278877	0.000228407	0.000246711	-1.4562	-0.940035	-0.422007	-0.732
	356	16	6	46	63	0.64937	0.64354	3	1.40876	2	3	No	-1265.03	10717.9	-2.522	0.258582	0.000396796	0.000225108	-1.79508	-0.775654	-0.489396	-0.808
	357	16	7	49	67	0.649902	0.648003	3	1.09816	3	1	No	-1217.63	10399.3	-2.487	0.248904	0.0005825	0.000639373	-1.95667	-0.594371	0.802901	-0.028
	358	16	8	45	73	0.539647	0.648655	3	1.31254	0	2	No	-915.946	8549.34	-2.118	0.303807	0.000986802	0.000116871	-1.03994	-0.199694	-0.827043	-0.744
	359	16	9	50	64	0.647116	0.64627	1	1.26545	0	3	No	-1067.05	9928.46	-2.131	0.262072	0.00099003	0.000322823	-1.73681	-0.196542	-0.184573	-0.497
	360	16	10	48	51	0.555426	0.649952	6	1.32767	0	2	No	-955.263	8361.32	-2.382	0.296537	0.000361657	0.000134557	-1.16134	-0.809957	-0.77187	-0.857
	361	16	11	45	73	0.641436	0.619975	6	0.65427	1	3	No	-970.962	9587.72	-1.901	0.291631	0.00023734	0.000218469	-1.24326	-0.931314	-0.510107	-0.741
	362	16	12	49	65	0.64612	0.636148	3	1.33265	3	3	No	-1349.8	11072.6	-2.665	0.242452	0.0006795	0.000466134	-2.0644	-0.49968	0.262482	-0.355
	363	16	13	50	66	0.63522	0.646364	3	1.41542	3	1	No	-1280.74	10832.1	-2.529	0.245576	0.0010678	0.00046267	-2.01225	-0.120622	0.251678	-0.276
	364	16	14	39	58	0.640217	0.65	6	1.3097	0	0	No	-798.062	7786.5	-1.947	0.339199	0.00232454	0.00020358	-0.448995	1.1062	-0.556554	-0.202
	365	16	15	33	45	0.649028	0.604756	6	1.57793	1	3	No	-855.746	9236.44	-1.582	0.243082	0.00188705	0.000120065	-2.05388	0.679127	-0.817079	-0.765
	366	16	16	49	74	0.645864	0.641191	4	1.22788	0	2	No	-1200.7	10546.6	-2.367	0.237544	2.47507e-06	0.000707501	-2.14636	-1.16059	1.01543	-0.052
	367	16	17	46	69	0.646914	0.623425	1	1.11285	2	0	No	-937.635	9291.82	-1.888	0.280523	0.000599767	8.3689e-05	-1.42872	-0.577515	-0.930552	-0.96
	368	16	18	50	65	0.643959	0.630309	2	0.679423	1	2	No	-988.702	9458.32	-2.022	0.284336	0.000368086	0.000516125	-1.36506	-0.803681	0.41843	-0.183
	369	16	19	45	73	0.643759	0.637348	1	0.695503	1	0	No	-945.953	9345.9	-1.899	0.292748	0.000407194	0.000518445	-1.22461	-0.765504	0.425668	-0.143
	370	16	20	46	66	0.642665	0.649899	4	1.23731	3	3	No	-1340.78	11242	-2.567	0.258919	0.000335022	0.000550266	-1.78945	-0.835958	0.524932	-0.21
	371	17	1	50	74	0.627439	0.543172	3	0.763258	3	0	No	-807.891	8599.75	-1.63	0.282243	0.000897552	0.000240817	-1.4	-0.286819	-0.440393	-0.602
	372	17	2	34	30	0.614448	0.637359	5	1.02548	0	3	No	-634.493	6123.37	-1.988	0.275375	0.000384556	0.000155961	-1.51468	-0.787603	-0.705099	-0.884
	373	17	3	43	74	0.644047	0.644886	6	1.03376	3	3	No	-1287.54	11410.5	-2.329	0.269022	0.00140565	0.000475022	-1.62076	0.209183	0.29021	-0.108
	374	17	4	50	31	0.649994	0.648344	2	1.41289	2	3	No	-902.487	8868.55	-1.92	0.294922	0.000526146	0.00034024	-1.1883	-0.649384	-0.130242	-0.446
	375	17	5	45	73	0.59355	0.649996	5	1.59135	0	0	No	-887.713	8744.46	-1.91	0.329293	0.00070404	0.000261919	-0.614406	-0.475725	-0.374565	-0.443
	376	17	6	46	31	0.387321	0.345395	1	0.708349	3	3	No	-137.194	2524.76	-0.164	0.342328	0.00172987	0.000343719	-0.396742	0.525689	-0.119389	-0.046
	377	17	7	50	62	0.468835	0.591008	6	0.625591	3	0	No	-641.857	6587.09	-1.76	0.364906	0.000375952	0.000148411	-0.0197561	-0.796002	-0.728652	-0.6
	378	17	8	49	74	0.625597	0.618728	5	0.802837	3	3	No	-1113.33	10301.6	-2.153	0.25936	0.00011558	0.000829372	-1.78208	-1.05018	1.3956	0.271
	379	17	9	50	30	0.629136	0.416418	4	0.619075	3	2	No	-358.636	5114.27	-0.749	0.362503	0.000209215	0.00021162	-0.0598855	-0.95877	-0.531473	-0.523
	380	17	10	48	30	0.649945	0.518966	4	0.72205	0	3	No	-526.603	6182.96	-1.305	0.342203	0.000102332	0.000327358	-0.398836	-1.06311	-0.170427	-0.395
	381	17	11	47	51	0.5968	0.455788	5	1.16186	0	0	No	-431.631	5343.44	-1.143	0.372067	0.000559514	0.000250892	0.0998072	-0.61681	-0.408963	-0.349
	382	17	12	49	65	0.613614	0.641468	4	1.32312	0	2	No	-1120.01	9589.09	-2.476	0.255831	0.000886574	0.000320564	-1.84101	-0.297536	-0.191621	-0.543
	383	17	13	50	57	0.593719	0.627321	5	1.54371	0	0	No	-815.803	8039.55	-1.909	0.343757	0.000830704	0.000108298	-0.372894	-0.352076	-0.853786	-0.657
	384	17	14	50	31	0.647138	0.561111	5	1.40856	0	1	No	-617.351	7055.46	-1.392	0.310963	0.000654035	0.000126985	-0.92046	-0.524539	-0.795491	-0.766
	385	17	15	50	52	0.649997	0.490092	4	0.741087	3	3	No	-704.305	7384.9	-1.683	0.321058	0.000372146	0.000116185	-0.751903	-0.799718	-0.829182	-0.808
	386	17	16	50	59	0.647747	0.638181	6	1.30819	0	3	No	-1286	10657.5	-2.619	0.255828	4.87118e-05	0.0005402	-1.84107	-1.11545	0.493532	-0.295
	387	17	17	47	37	0.546514	0.641414	5	1.42627	1	2	No	-808.217	7811.93	-1.982	0.285877	0.000426635	9.86945e-05	-1.33932	-0.746526	-0.883743	-0.947
	388	17	18	39	32	0.649972	0.64997	6	0.802098	3	1	No	-804.617	7104.09	-2.345	0.300331	0.00139143	7.13446e-05	-1.09798	0.195306	-0.969061	-0.762
	389	17	19	49	49	0.649684	0.649898	1	1.5029	3	3	No	-964.406	10524.4	-1.545	0.271607	0.000102717	0.000319377	-1.57759	-1.06273	-0.195325	-0.645
	390	17	20	34	30	0.649982	0.573221	5	0.692963	0	1	No	-480.591	5115.98	-1.63	0.30651	0.00221793	6.36668e-05	-0.994814	1.00213	-0.993012	-0.594
	391	18	1	50	49	0.576673	0.622032	6	0.648337	0	3	No	-805.674	7738.95	-2.006	0.33756	0.000299488	0.000145546	-0.47636	-0.870646	-0.737588	-0.712
	392	18	2	50	59	0.649968	0.648971	1	1.58463	3	3	No	-1050.48	10386.9	-1.896	0.257763	0.00095507	0.000253249	-1.80876	-0.23067	-0.401612	-0.649
	393	18	3	50	73	0.6462	0.642268	2	1.51265	1	3	No	-1342.86	11244.8	-2.573	0.237152	0.000245108	0.000775396	-2.1529	-0.923731	1.22722	0.121
	394	18	4	49	59	0.636035	0.640723	4	1.14397	3	1	No	-1191.72	9894.89	-2.611	0.265245	0.000247213	0.000274641	-1.68383	-0.921677	-0.334878	-0.722
	395	18	5	49	71	0.54932	0.520546	4	0.603523	0	3	No	-608.479	6914.28	-1.41	0.331188	0.000115084	0.000107597	-0.582749	-1.05066	-0.855972	-0.84
	396	18	6	50	74	0.628694	0.649999	2	1.44379	3	3	No	-1386.9	11619.7	-2.571	0.243109	3.71906e-05	0.00106839	-2.05344	-1.1267	2.14122	0.649
	397	18	7	41	60	0.513389	0.557316	4	0.601739	3	0	No	-523.169	5838.74	-1.47	0.35346	0.00353031	0.000395839	-0.21087	2.28326	0.0431974	0.44
	398	18	8	47	64	0.647669	0.641244	2	1.55941	3	3	No	-1333.32	10967.4	-2.653	0.240779	0.000693035	0.000592558	-2.09233	-0.486467	0.656863	-0.122
	399	18	9	50	56	0.578867	0.642436	5	0.6487	3	3	No	-941.801	8689.58	-2.165	0.320041	0.000201824	0.000173144	-0.76888	-0.965985	-0.651499	-0.738
	400	18	10	40	33	0.649922	0.642192	3	1.50578	2	0	No	-794.246	7245.05	-2.211	0.263059	0.000810203	0.000270992	-1.72032	-0.372089	-0.346263	-0.626
	401	18	11	44	62	0.630294	0.649984	6	1.38734	2	0	No	-1121.43	9782.2	-2.396	0.282047	0.000770148	0.000200068	-1.40328	-0.41119	-0.567509	-0.703
	402	18	12	46	30	0.153407	0.150025	5	1.0321	0	0	No	-4.98168	384.551	1.367	0.561498	9.52849e-05	1.8796e-08	3.2628	-1.06999	-1.19156	-0.276
	403	18	13	49	74	0.64798	0.641674	6	1.41918	2	3	No	-1548.4	13248.9	-2.479	0.226748	0.000638844	0.000688964	-2.32662	-0.539368	0.957602	0.001
	404	18	14	50	57	0.611454	0.640467	5	1.54336	1	3	No	-1277.66	10998.4	-2.453	0.249458	0.000548621	0.000197147	-1.94742	-0.627443	-0.576621	-0.861
	405	18	15	46	65	0.60132	0.649889	5	1.14067	1	0	No	-968.858	8928.58	-2.169	0.292836	0.000284462	0.000122964	-1.22314	-0.885314	-0.808035	-0.907
	406	18	16	33	39	0.649998	0.649559	6	0.611373	1	1	No	-641.272	6236.26	-1.959	0.302114	0.00339706	6.90273e-05	-1.06821	2.15319	-0.97629	-0.369
	407	18	17	42	59	0.641601	0.645755	5	1.57558	1	3	No	-1297.99	10975.7	-2.53	0.262012	0.00113978	0.000195704	-1.7378	-0.0503572	-0.581123	-0.706
	408	18	18	50	71	0.649646	0.639475	5	0.778762	0	1	No	-1066.8	10066.9	-2.075	0.265179	0.00103602	0.000781064	-1.68493	-0.151647	1.24491	0.38
	409	18	19	40	32	0.640755	0.62823	6	1.36925	0	0	No	-598.917	6153.64	-1.755	0.318005	0.00193397	0.000106226	-0.80287	0.724922	-0.860249	-0.532
	410	18	20	44	34	0.524107	0.649658	5	1.49114	0	2	No	-727.638	6884.46	-2.065	0.264425	0.000856224	5.28195e-05	-1.69751	-0.327163	-1.02685	-1.021
	411	19	1	41	39	0.307565	0.648028	2	0.703788	1	1	No	-314.953	3376.9	-1.605	0.328406	0.00342529	0.000263372	-0.629212	2.18075	-0.370032	0.088
	412	19	2	49	33	0.645571	0.646473	4	0.622244	2	3	No	-790.321	7855.42	-1.877	0.338746	0.000712121	4.58642e-05	-0.456552	-0.467836	-1.04855	-0.814
	413	19	3	50	51	0.648951	0.631869	5	1.59994	0	0	No	-871.523	8480.2	-1.957	0.334493	0.00044332	9.6757e-05	-0.527566	-0.730237	-0.889787	-0.785
	414	19	4	50	70	0.31537	0.648632	6	1.31599	3	0	No	-653.493	6490.95	-1.879	0.265675	0.000396388	0.00019055	-1.67664	-0.776053	-0.597201	-0.849
	415	19	5	50	70	0.595526	0.525099	3	0.600726	3	3	No	-705.802	7791.35	-1.506	0.311965	0.000619959	0.000220945	-0.903724	-0.557803	-0.502382	-0.594
	416	19	6	50	69	0.631894	0.639596	4	1.53527	3	1	No	-1400.34	11614.9	-2.615	0.232116	0.00118625	0.000420505	-2.23699	-0.00499668	0.120144	-0.376
	417	19	7	48	50	0.649697	0.640293	3	1.57034	3	0	No	-1096.06	9559.89	-2.397	0.269437	0.00118046	8.6666e-05	-1.61383	-0.010649	-0.921266	-0.878
	418	19	8	42	51	0.649443	0.647044	2	1.06018	1	3	No	-953.799	8409.21	-2.351	0.30051	0.000555589	0.000143118	-1.095	-0.620642	-0.745163	-0.79
	419	19	9	50	69	0.632375	0.647029	5	1.35141	0	2	No	-1237.28	10615.9	-2.467	0.247458	3.22033e-05	0.000479641	-1.98082	-1.13157	0.304618	-0.44
	420	19	10	33	50	0.580317	0.632353	6	0.606036	3	3	No	-638.16	6585.21	-1.74	0.303868	0.00253287	0.000112247	-1.03893	1.30957	-0.841467	-0.451
	421	19	11	36	42	0.588267	0.649339	6	0.863181	1	3	No	-793.819	6978.09	-2.364	0.275001	0.00103455	0.000219909	-1.52092	-0.153081	-0.505615	-0.638
	422	19	12	37	58	0.648605	0.610852	5	0.669329	0	2	No	-729.666	7474.63	-1.766	0.359828	0.0056481	0.00192693	-0.104547	4.35064	4.81943	3.741
	423	19	13	49	68	0.421116	0.649999	3	1.08294	3	2	No	-805.578	7291.27	-2.242	0.315108	0.000110015	0.000319815	-0.851241	-1.05561	-0.193958	-0.498
	424	19	14	50	51	0.645084	0.649972	4	0.943913	2	2	No	-1077.26	9475.07	-2.361	0.297094	0.000357619	0.000214908	-1.15203	-0.813899	-0.521215	-0.706
	425	19	15	42	50	0.151567	0.642833	3	1.5523	0	1	No	-87.2513	2217.71	0.391	0.351497	0.000451776	0.000463418	-0.243658	-0.721983	0.25401	-0.041
	426	19	16	48	60	0.64866	0.64997	2	1.59967	3	3	No	-1263.81	10970	-2.417	0.253105	7.05279e-05	0.0004034	-1.88652	-1.09416	0.0667841	-0.556
	427	19	17	50	67	0.645736	0.649935	6	1.32488	3	2	No	-1524.22	12527.1	-2.656	0.24221	0.000296335	0.0004304	-2.06844	-0.873724	0.151012	-0.498
	428	19	18	42	64	0.61884	0.649222	5	1.49745	3	0	No	-1202.77	10181.1	-2.526	0.270212	0.000215852	0.000107301	-1.60089	-0.952291	-0.856895	-1.025
	429	19	19	49	74	0.649656	0.6474	6	0.752726	3	3	No	-1224.97	11145.9	-2.221	0.257356	1.92708e-05	0.00108458	-1.81555	-1.14419	2.19171	0.723
	430	19	20	49	62	0.646204	0.645607	4	0.624703	3	3	No	-1043.49	9660.41	-2.151	0.280936	0.000463846	0.000801765	-1.42183	-0.710201	1.30948	0.359
	431	20	1	48	74	0.645647	0.624851	2	1.59126	3	3	No	-1340.11	12094.8	-2.254	0.239448	0.000866156	0.00044784	-2.11457	-0.317467	0.205416	-0.363
	432	20	2	48	52	0.619939	0.641058	1	1.48903	2	0	No	-866.007	8746.48	-1.818	0.289591	0.000172299	9.33652e-05	-1.27732	-0.994807	-0.900367	-0.995
	433	20	3	48	58	0.602602	0.649993	6	1.31089	1	1	No	-1078	9372.16	-2.41	0.279557	0.000460749	0.000266251	-1.44486	-0.713224	-0.361051	-0.648
	434	20	4	50	71	0.630375	0.629658	6	1.43226	2	3	No	-1546.84	12782.2	-2.632	0.234442	0.000704874	0.000821671	-2.19815	-0.47491	1.37158	0.288
	435	20	5	49	30	0.613809	0.511903	4	1.59995	1	1	No	-470.518	6554.36	-0.81	0.298208	0.000623847	7.42957e-05	-1.13343	-0.554009	-0.959855	-0.913
	436	20	6	47	55	0.571358	0.649616	6	1.59416	1	0	No	-956.046	8331.38	-2.4	0.284234	0.00139202	9.7964e-05	-1.36676	0.195881	-0.886022	-0.766
	437	20	7	38	30	0.327081	0.6425	6	0.67998	3	3	No	-394.829	3962.33	-1.841	0.311868	0.00229109	0.000254312	-0.905348	1.07355	-0.398295	-0.205
	438	20	8	49	31	0.648142	0.649793	5	1.24322	0	0	No	-687.665	7356.22	-1.613	0.360264	0.00025826	5.82142e-05	-0.0972655	-0.910892	-1.01002	-0.808
	439	20	9	50	30	0.584076	0.641837	5	1.59721	3	1	No	-836.372	9411.48	-1.442	0.265067	0.000774113	7.96288e-05	-1.6868	-0.40732	-0.943218	-0.985
	440	20	10	39	30	0.648518	0.576977	5	1.13102	2	0	No	-595.514	6144.9	-1.74	0.311844	0.00180839	0.000406121	-0.905755	0.602338	0.0752737	-0.016
	441	20	11	47	38	0.586062	0.647132	4	1.36694	1	3	No	-897.195	8389.54	-2.111	0.290788	0.000450409	9.7571e-05	-1.25733	-0.723317	-0.887247	-0.928
	442	20	12	50	54	0.605112	0.649222	4	1.55418	3	1	No	-1255.49	10426.5	-2.61	0.260986	0.00148126	0.000280584	-1.75494	0.282991	-0.316339	-0.484
	443	20	13	30	30	0.629762	0.623334	3	0.64944	1	3	No	-506.382	5129.32	-1.807	0.297184	0.00216559	0.000159025	-1.15053	0.951033	-0.695542	-0.457
	444	20	14	46	30	0.614566	0.588142	3	1.58767	3	0	No	-671.769	7327	-1.547	0.275691	0.000413646	4.328e-05	-1.50941	-0.759205	-1.05661	-1.088
	445	20	15	49	36	0.649899	0.63836	2	0.776655	0	3	No	-778.181	7747.35	-1.871	0.327744	0.000118689	7.79465e-05	-0.640263	-1.04714	-0.948466	-0.907
	446	20	16	36	47	0.648833	0.649715	5	1.34291	3	3	No	-1218.41	9962.92	-2.679	0.24152	0.000453785	0.000256847	-2.07997	-0.720022	-0.390386	-0.794
	447	20	17	41	68	0.553477	0.624168	6	0.646052	3	3	No	-785.559	8049.17	-1.765	0.323911	0.0010764	0.000247784	-0.704259	-0.112232	-0.418658	-0.414
	448	20	18	46	68	0.638701	0.649982	4	1.24805	0	2	No	-1124.75	9971.61	-2.328	0.269314	0.000647621	0.00036201	-1.61589	-0.5308	-0.0623325	-0.467
	449	20	19	43	57	0.618646	0.647484	6	0.646223	2	2	No	-883.557	8393.22	-2.049	0.340408	0.00216695	0.000101453	-0.428802	0.952362	-0.875137	-0.42
	450	20	20	39	31	0.606447	0.642024	3	1.59995	0	0	No	-554.146	5703.97	-1.749	0.376588	0.00243255	0.000259702	0.175299	1.21164	-0.381481	0.048
	451	21	1	50	73	0.637119	0.645792	6	1.57093	2	3	No	-1696.26	13927.3	-2.661	0.223812	0.000978961	0.000618088	-2.37564	-0.207348	0.736503	-0.075
	452	21	2	50	73	0.649629	0.647328	5	1.48317	3	0	No	-1459.65	11960.8	-2.67	0.232068	0.00042749	0.000368463	-2.23778	-0.745691	-0.0422022	-0.622
	453	21	3	50	67	0.649999	0.623449	1	1.59966	0	1	No	-988.83	9614.69	-1.96	0.245587	0.00110126	0.000173129	-2.01207	-0.0879628	-0.651544	-0.811
	454	21	4	49	60	0.648909	0.643331	6	1.56309	0	3	No	-1311.16	11391.7	-2.413	0.233641	0.00119337	0.000399258	-2.21153	0.00195279	0.0538648	-0.41
	455	21	5	41	70	0.643568	0.649999	4	1.46077	1	3	No	-1231.45	10913.3	-2.33	0.277601	0.0011979	0.000254414	-1.47752	0.00637901	-0.397977	-0.533
	456	21	6	48	48	0.557622	0.649448	6	1.58301	0	0	No	-728.247	7137.6	-1.929	0.361458	0.000771059	0.00027268	-0.0773364	-0.410301	-0.340996	-0.302
	457	21	7	36	33	0.621679	0.636951	3	1.21126	3	3	No	-808.769	7257.6	-2.278	0.259781	0.00128508	0.000450795	-1.77506	0.0914801	0.214633	-0.208
	458	21	8	40	36	0.637236	0.649594	4	0.673971	3	3	No	-777.241	7185.86	-2.156	0.289538	0.000669194	0.000154104	-1.2782	-0.50974	-0.710893	-0.784
	459	21	9	50	61	0.630909	0.648439	3	1.2736	3	2	No	-1235.54	10470.1	-2.521	0.25953	6.08746e-05	0.000266131	-1.77925	-1.10358	-0.361426	-0.793
	460	21	10	49	54	0.600673	0.648056	4	0.604955	1	3	No	-887.221	8368.36	-2.077	0.319788	0.000488106	0.00048304	-0.773109	-0.686518	0.315222	-0.103
	461	21	11	48	68	0.244841	0.649487	4	0.665547	3	3	No	-395.954	4226.72	-1.62	0.320345	0.00243237	0.00012526	-0.76381	1.21146	-0.800873	-0.391
	462	21	12	48	56	0.648668	0.641758	1	0.600184	2	3	No	-900.486	8681.19	-1.992	0.31407	0.000265265	9.98859e-05	-0.868573	-0.904054	-0.880026	-0.883
	463	21	13	45	58	0.63292	0.647289	4	1.3858	0	0	No	-862.888	8277.37	-2.011	0.337254	0.000452976	0.000178174	-0.481466	-0.720812	-0.635807	-0.622
	464	21	14	29	73	0.641086	0.452433	1	0.648342	3	3	No	-388.712	5770.42	-0.646	0.306798	0.00348134	0.000239592	-0.990011	2.23546	-0.444212	-0.017
	465	21	15	33	36	0.63735	0.568957	2	0.606382	1	3	No	-479.031	5174.19	-1.58	0.318491	0.00349141	0.000372204	-0.794768	2.24529	-0.0305305	0.272
	466	21	16	41	34	0.647679	0.428926	6	0.735257	1	2	No	-377.283	4872.13	-1.019	0.360159	0.000536349	0.000234438	-0.0990175	-0.639423	-0.460292	-0.424
	467	21	17	48	53	0.618726	0.64159	2	1.09835	1	3	No	-949.074	8719.96	-2.181	0.301624	2.12975e-05	0.000107014	-1.07639	-1.14221	-0.85779	-0.958
	468	21	18	28	48	0.642769	0.562916	5	0.835299	1	2	No	-525.867	5907.55	-1.448	0.276757	0.00150115	0.000441642	-1.49161	0.30241	0.186081	-0.126
	469	21	19	45	63	0.645046	0.568914	3	0.623061	3	3	No	-783.913	8133.57	-1.72	0.320675	0.000150987	0.000244899	-0.758289	-1.01561	-0.427659	-0.611
	470	21	20	39	51	0.618931	0.649325	6	1.26631	1	0	No	-855.243	7593.33	-2.322	0.284108	0.00161726	6.97145e-05	-1.36886	0.415752	-0.974146	-0.775
	471	22	1	20	31	0.494156	0.153684	3	0.608526	0	0	No	-6.24609	752.141	1.539	0.534484	0.000205892	8.99178e-08	2.81173	-0.962014	-1.19134	-0.345
	472	22	2	49	33	0.584992	0.635375	3	0.682112	2	3	No	-687.716	7005.07	-1.787	0.327243	0.000755722	0.000349626	-0.648633	-0.425273	-0.100964	-0.275
	473	22	3	50	51	0.48966	0.609406	5	0.975338	0	3	No	-737.128	6922.42	-2.094	0.321173	0.000367033	0.00028049	-0.749982	-0.804709	-0.316633	-0.501
	474	22	4	45	45	0.624974	0.648958	5	0.887349	0	3	No	-926.799	8047.8	-2.415	0.309782	0.000561988	0.000101904	-0.94018	-0.614395	-0.873731	-0.835
	475	22	5	46	48	0.603167	0.641692	3	1.59995	1	0	No	-835.562	7853.6	-2.091	0.291008	0.000681002	0.000109693	-1.25365	-0.498214	-0.849433	-0.86
	476	22	6	50	73	0.645124	0.649966	2	1.51436	3	0	No	-1226.49	11055.8	-2.259	0.235288	0.000259957	0.000231043	-2.18402	-0.909236	-0.470881	-0.901
	477	22	7	39	34	0.647269	0.634897	6	1.25641	0	0	No	-611.971	6186.47	-1.814	0.373587	0.00411168	0.000341782	0.125184	2.85079	-0.125432	0.52
	478	22	8	45	74	0.646192	0.64993	2	1.30304	3	3	No	-1463.25	12981.2	-2.325	0.252416	0.0004322	0.000505511	-1.89803	-0.741093	0.38532	-0.297
	479	22	9	36	32	0.165073	0.15002	4	0.604953	1	0	No	-4.33601	434.422	1.477	0.473397	3.68914e-05	4.62368e-08	1.79174	-1.12699	-1.19148	-0.582
	480	22	10	50	53	0.608648	0.644603	3	1.46655	1	3	No	-1090.29	9652.44	-2.334	0.270442	0.000668157	0.000155612	-1.59705	-0.510754	-0.706189	-0.845
	481	22	11	43	55	0.622405	0.649527	5	1.56338	3	3	No	-1389.48	11789.8	-2.515	0.268429	8.73991e-05	0.000536633	-1.63066	-1.07769	0.482406	-0.252
	482	22	12	50	72	0.59921	0.649996	6	1.6	3	3	No	-1704.51	14304.4	-2.563	0.232592	0.000733279	0.000997441	-2.22904	-0.447182	1.9199	0.617
	483	22	13	21	34	0.378488	0.552227	4	0.737977	2	0	No	-159.215	2415.66	-0.593	0.376413	0.000744536	0.000210237	0.172385	-0.436192	-0.535786	-0.374
	484	22	14	46	31	0.649851	0.649998	6	1.26717	2	0	No	-846.315	8130.17	-2.006	0.287073	0.000434431	0.000169505	-1.31935	-0.738915	-0.662848	-0.809
	485	22	15	49	74	0.648175	0.649959	6	1.17565	3	3	No	-1648.05	12791.2	-2.922				-6.11269	-1.163	-1.19162	0
	486	22	16	40	49	0.648859	0.648732	5	1.37227	2	3	No	-1215.21	10132.9	-2.592				-6.11269	-1.163	-1.19162	0
	487	22	17	47	73	0.631071	0.649196	6	1.53502	1	0	No	-1194.58	10263.9	-2.461				-6.11269	-1.163	-1.19162	0
	488	22	18	29	35	0.649875	0.648012	3	1.25991	0	2	No	-632.811	5846.27	-2.159				-6.11269	-1.163	-1.19162	0
	489	22	19	36	32	0.597628	0.612421	6	0.602845	1	0	No	-513.466	5315.75	-1.728				-6.11269	-1.163	-1.19162	0
	490	22	20	50	64	0.313028	0.64934	4	0.738511	1	0	No	-459.186	4733.22	-1.744				-6.11269	-1.163	-1.19162	0

## Sheet: ParetoDesigns
	Optimum Design	Design Parameters
		NV	NC	W	H	NL	RH	NCW	NCCW
	A	50	73	0.621864	0.649428	6	1.28205	3	3		509
	B	47	57	0.640284	0.641099	4	1.37349	3	3		553
	C	49	56	0.632047	0.649222	4	1.54488	3	0		570
	D	49	57	0.647649	0.649925	5	1.33704	1	1		413
	E	48	62	0.590773	0.65	4	1.58479	0	3		460
	F	48	67	0.562784	0.636805	3	1.3603	0	3		445
	G	46	69	0.629916	0.648706	3	1.41531	1	0		565
	H	34	30	0.579661	0.649609	2	1.40224	1	0		545
	I	42	34	0.5837	0.58275	6	1.39567	1	0		327
	J	50	53	0.609357	0.63061	1	1.59581	0	1		537
	K	20	30	0.15	0.15	1	1.6	3	0		6
	L	20	30	0.15	0.15	6	1.6	0	3		13
